# Supplementary material for: Lipase-Catalyzed Phospha-Michael Addition Reactions under Mild Conditions
Source: MDPI journal article supplement (doi:10.3390/molecules27227798), 2022-11-12

Article

# Lipase-Catalyzed Phospha-Michael Addition Reactions under Mild Conditions

Yuelin Xu <sup>1</sup>, Fengxi Li <sup>1</sup>, Jinglin Ma <sup>1</sup>, Jiapeng Li <sup>1</sup>, Hanqing Xie <sup>1</sup>, Chunyu Wang <sup>2</sup>, Peng Chen <sup>3,\*</sup> and Lei Wang <sup>1,\*</sup>

<sup>1</sup> Key Laboratory of Molecular Enzymology and Engineering of Ministry of Education, School of Life Sciences, Jilin University, Changchun 130023, China

<sup>2</sup> State Key Laboratory of Supramolecular Structure and Materials, Jilin University, Changchun, 130023, China

<sup>3</sup> The Second Hospital of Jilin University Changchun, Jilin University, Changchun 130041, China

\* Correspondence: c\_p@jlu.edu.cn (P.C.); w\_lei@jlu.edu.cn (L.W.)

## Contents:

|                                         |          |
|-----------------------------------------|----------|
| <b>The Time Course .....</b>            | <b>1</b> |
| <b>Reusability of Novozym 435 .....</b> | <b>1</b> |
| <b>Data of Products .....</b>           | <b>2</b> |
| <b>Spectra of Products .....</b>        | <b>9</b> |

## The Time Course

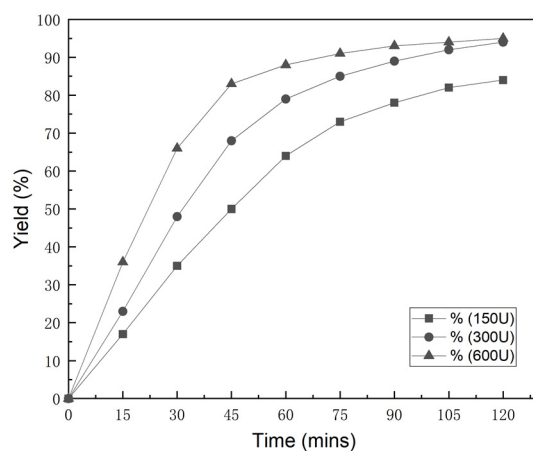

**Figure S1.** The time course of different dosage lipase-catalyzed phospho-Michael addition reaction. Reaction conditions: **1a** (0.5 mmol), **2** (0.5 mmol), Novozym 435, rt, and EtOH (1 mL).

## Reusability of Novozym 435

**Table S1.** Reusability of Novozym 435 on the phospho-Michael addition reaction.

| Cycle | Enzyme weight (mg) | Yield (%) |
|-------|--------------------|-----------|
| 1     | 20.0               | 94        |
| 2     | 19.8               | 93        |
| 3     | 19.4               | 92        |
| 4     | 19.2               | 89        |
| 5     | 18.9               | 86        |
| 6     | 18.5               | 81        |
| 7     | 18.2               | 78        |
| 8     | 17.9               | 72        |

Reaction conditions: **1a** (0.5 mmol), **2** (0.5 mmol), Novozym 435 (300 U = 20mg), rt, and EtOH (1 mL).

## Data of Products

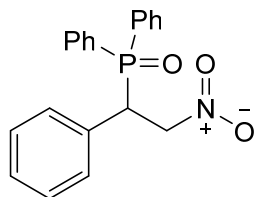

### **3a** ((2-nitro-1-phenylethyl) diphenylphosphine oxide)

White solid, yield: 165mg, 94%;  $^1\text{H}$  NMR (400 MHz,  $\text{DMSO-}d_6$ )  $\delta$  8.18 – 8.10 (m, 2H), 7.78 – 7.70 (m, 2H), 7.68 – 7.62 (m, 3H), 7.41 (td,  $J = 7.2, 1.6$  Hz, 3H), 7.37 – 7.31 (m, 2H), 7.23 – 7.12 (m, 3H), 5.15 – 4.97 (m, 2H), 4.91 – 4.81 (m, 1H).  $^{13}\text{C}$  NMR (151 MHz, DMSO)  $\delta$  133.20, 132.62, 131.52, 131.21, 131.15, 131.06, 131.00, 130.62, 130.41, 129.81, 129.73, 128.98, 128.90, 128.83, 128.37, 76.47, 76.06, 44.44, 44.02.  $^{31}\text{P}$  NMR (243 MHz, DMSO)  $\delta$  30.84.

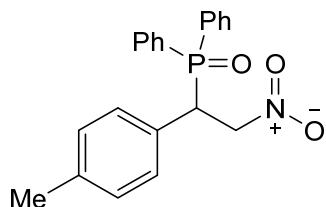

### **3b** ((2-nitro-1-(p-tolyl) ethyl) diphenylphosphine oxide)

White solid, yield: 173mg, 95%;  $^1\text{H}$  NMR (400 MHz,  $\text{Chloroform-}d$ )  $\delta$  8.01 – 7.94 (m, 2H), 7.67 – 7.56 (m, 3H), 7.51 – 7.45 (m, 2H), 7.40 (dd,  $J = 7.2, 1.6$  Hz, 1H), 7.30 (td,  $J = 6.4, 5.6, 3.6$  Hz, 2H), 7.17 (dd,  $J = 8.0, 2.0$  Hz, 2H), 7.02 (d,  $J = 7.6$  Hz, 2H), 5.11 – 5.01 (m, 1H), 4.77 – 4.71 (m, 1H), 4.41 (s, 1H), 2.26 (d,  $J = 1.6$  Hz, 3H).  $^{13}\text{C}$  NMR (151 MHz, DMSO)  $\delta$  135.71, 130.35, 129.74, 128.85, 128.79, 128.69, 128.23, 128.09, 127.59, 127.40, 127.15, 126.91, 126.05, 125.97, 114.09, 74.98, 74.77, 74.56, 73.57, 73.53, 43.28, 42.86, 18.73.  $^{31}\text{P}$  NMR (243 MHz, DMSO)  $\delta$  24.87.

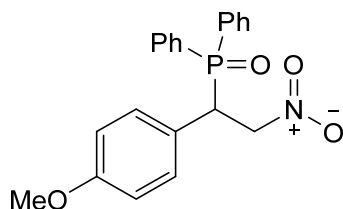

### **3c** ((1-(4-methoxyphenyl)-2-nitroethyl) diphenylphosphine oxide)

White solid, yield: 169mg, 89%;  $^1\text{H}$  NMR (400 MHz,  $\text{DMSO-}d_6$ )  $\delta$  8.15 – 8.07 (m, 2H), 7.81 – 7.72 (m, 2H), 7.65 (dt,  $J = 6.0, 3.6$  Hz, 3H), 7.45 – 7.32 (m, 5H), 6.80 – 6.74 (m, 2H), 5.06 – 4.90 (m, 2H), 4.84 – 4.77 (m, 1H), 3.67 (s, 3H).  $^{13}\text{C}$  NMR (151 MHz, DMSO)  $\delta$  159.06, 133.08, 132.53, 131.18, 131.07, 130.28, 129.75, 129.67, 128.99, 128.91, 124.34, 114.20, 76.34, 55.38, 55.06, 43.58, 43.15.  $^{31}\text{P}$  NMR (243 MHz, DMSO)  $\delta$  30.56.

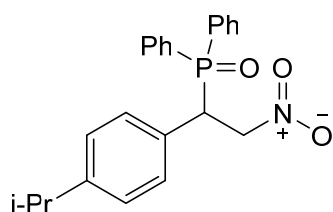

**3d** ((1-(4-isopropylphenyl)-2-nitroethyl) diphenylphosphine oxide)

White solid, yield: 157mg, 80%;  $^1\text{H}$  NMR (400 MHz, Chloroform-*d*)  $\delta$  8.01 (t,  $J$  = 9.2 Hz, 2H), 7.66 (dq,  $J$  = 14.0, 7.2 Hz, 3H), 7.43 (q,  $J$  = 7.6, 6.4 Hz, 3H), 7.31 (d,  $J$  = 2.8 Hz, 1H), 7.28 (s, 1H), 7.21 (d,  $J$  = 8.0 Hz, 2H), 7.09 (d,  $J$  = 7.2 Hz, 2H), 5.13 (s, 1H), 4.78 (d,  $J$  = 13.6 Hz, 1H), 4.45 (d,  $J$  = 10.8 Hz, 1H), 2.89 – 2.79 (m, 1H), 1.20 (d,  $J$  = 6.9 Hz, 6H).  $^{13}\text{C}$  NMR (151 MHz,  $\text{CDCl}_3$ )  $\delta$  149.03, 132.73, 132.53, 132.04, 131.31, 131.14, 130.76, 130.47, 129.81, 129.35, 129.27, 128.61, 128.28, 128.21, 126.84, 75.89, 75.71, 45.77, 45.33, 33.68, 23.82.  $^{31}\text{P}$  NMR (243 MHz,  $\text{CDCl}_3$ )  $\delta$  30.26.

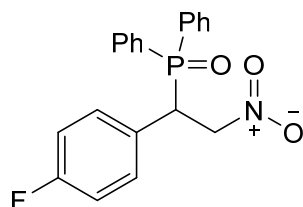

**3e** ((1-(4-fluorophenyl)-2-nitroethyl) diphenylphosphine oxide)

White solid, yield: 160mg 87%;  $^1\text{H}$  NMR (400 MHz,  $\text{DMSO}-d_6$ )  $\delta$  8.20 – 8.08 (m, 2H), 7.74 (ddd,  $J$  = 11.6, 6.8, 1.6 Hz, 2H), 7.69 – 7.63 (m, 3H), 7.51 – 7.33 (m, 5H), 7.06 (t,  $J$  = 8.8 Hz, 2H), 5.12 – 5.07 (m, 2H), 4.85 (s, 1H).  $^{13}\text{C}$  NMR (151 MHz,  $\text{DMSO}$ )  $\delta$  139.74, 139.53, 133.09, 132.49, 131.88, 131.31, 131.25, 131.09, 131.04, 130.74, 130.39, 129.73, 129.65, 129.31, 128.93, 128.86, 115.70, 115.55, 76.24, 76.23, 43.56, 43.14.  $^{31}\text{P}$  NMR (243 MHz,  $\text{DMSO}$ )  $\delta$  29.97.

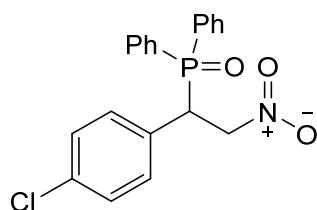

**3f** ((1-(4-chlorophenyl)-2-nitroethyl) diphenylphosphine oxide)

White solid, yield: 169mg, 88%;  $^1\text{H}$  NMR (400 MHz, Chloroform-*d*)  $\delta$  7.99 (dd,  $J$  = 11.2, 7.6 Hz, 2H), 7.70 – 7.59 (m, 3H), 7.53 – 7.41 (m, 3H), 7.34 (dt,  $J$  = 10.8, 5.2 Hz, 2H), 7.27 (dd,  $J$  = 8.4, 1.6 Hz, 2H), 7.21 (d,  $J$  = 8.4 Hz, 2H), 5.06 (d,  $J$  = 3.2 Hz, 1H), 4.78 – 4.70 (m, 1H), 4.47 – 4.38 (m, 1H).  $^{13}\text{C}$  NMR (151 MHz,  $\text{CDCl}_3$ )  $\delta$  134.43, 132.92, 132.34, 131.15, 131.09, 130.95, 130.89, 130.74, 130.32, 130.13, 129.48, 129.40, 129.05, 128.59, 128.51, 75.69, 75.65, 45.46, 45.04.  $^{31}\text{P}$  NMR (243 MHz,  $\text{CDCl}_3$ )  $\delta$  29.53.

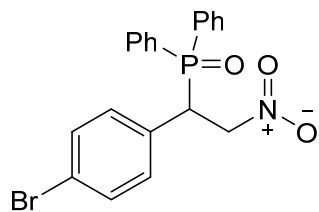

**3g** ((1-(4-bromophenyl)-2-nitroethyl) diphenylphosphine oxide)

White solid, yield: 193mg, 90%;  $^1\text{H}$  NMR (400 MHz,  $\text{DMSO}-d_6$ )  $\delta$  8.13 (td,  $J = 8.0, 3.6$  Hz, 2H), 7.76 (dd,  $J = 11.6, 7.6$  Hz, 2H), 7.69 – 7.62 (m, 3H), 7.48 – 7.35 (m, 7H), 5.13 – 5.05 (m, 2H), 4.90 – 4.80 (m, 1H).  $^{13}\text{C}$  NMR (151 MHz,  $\text{DMSO}$ )  $\delta$  133.13, 132.71, 132.60, 132.19, 131.99, 131.67, 131.29, 131.10, 131.03, 130.65, 130.27, 129.75, 129.67, 128.94, 121.60, 76.00, 43.75, 43.33.  $^{31}\text{P}$  NMR (243 MHz,  $\text{DMSO}$ )  $\delta$  29.69.

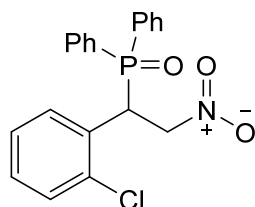

**3h** ((1-(2-chlorophenyl)-2-nitroethyl) diphenylphosphine oxide)

White solid, yield: 161mg 84%;  $^1\text{H}$  NMR (400 MHz,  $\text{Chloroform}-d$ )  $\delta$  8.10 (ddd,  $J = 11.2, 7.6, 1.6$  Hz, 2H), 7.89 (d,  $J = 7.6$  Hz, 1H), 7.74 – 7.64 (m, 3H), 7.49 – 7.39 (m, 3H), 7.34 (dt,  $J = 8.4, 4.0$  Hz, 1H), 7.26 (dd,  $J = 7.6, 3.2$  Hz, 2H), 7.19 (d,  $J = 4.0$  Hz, 2H), 5.25 (dd,  $J = 9.2, 3.2$  Hz, 1H), 5.20 – 5.11 (m, 1H), 4.79 (ddd,  $J = 13.6, 6.0, 3.2$  Hz, 1H).  $^{13}\text{C}$  NMR (151 MHz,  $\text{CDCl}_3$ )  $\delta$  134.95, 132.97, 132.26, 131.94, 131.30, 131.24, 130.95, 130.89, 130.19, 129.91, 129.71, 129.56, 129.47, 129.41, 128.42, 128.20, 128.12, 127.52, 75.39, 75.38, 41.14, 40.72.  $^{31}\text{P}$  NMR (243 MHz,  $\text{CDCl}_3$ )  $\delta$  30.73.

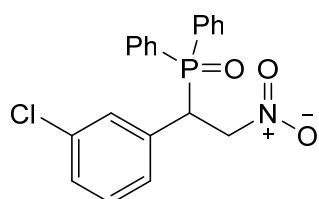

**3i** ((1-(3-chlorophenyl)-2-nitroethyl) diphenylphosphine oxide)

White solid, yield: 154mg, 80%;  $^1\text{H}$  NMR (400 MHz,  $\text{Chloroform}-d$ )  $\delta$  8.01 (dd,  $J = 11.2, 7.6$  Hz, 2H), 7.67 (t,  $J = 9.2$  Hz, 3H), 7.53 – 7.43 (m, 3H), 7.36 (dt,  $J = 8.8, 4.4$  Hz, 2H), 7.28 – 7.16 (m, 4H), 5.15 – 5.03 (m, 1H), 4.80 – 4.73 (m, 1H), 4.46 – 4.36 (m, 1H).  $^{13}\text{C}$  NMR (151 MHz,  $\text{CDCl}_3$ )  $\delta$  134.61, 133.83, 132.98, 132.41, 131.19, 131.13, 130.99, 130.93, 130.01, 129.65, 129.49, 129.42, 128.57, 128.49, 127.47, 75.45, 45.76, 45.34.  $^{31}\text{P}$  NMR (243 MHz,  $\text{CDCl}_3$ )  $\delta$  29.82.

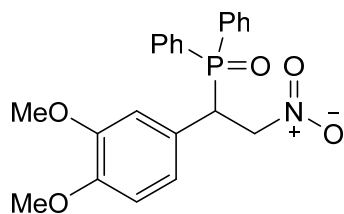

**3j** (1-(3,4-dimethoxyphenyl)-2-nitroethyl) diphenylphosphine oxide

White solid, yield: 154mg, 75%;  $^1\text{H}$  NMR (400 MHz, Chloroform-*d*)  $\delta$  7.99 (dd,  $J$  = 11.2, 7.6 Hz, 2H), 7.70 – 7.59 (m, 3H), 7.53 – 7.41 (m, 3H), 7.34 (dt,  $J$  = 10.8, 5.2 Hz, 2H), 7.27 (dd,  $J$  = 8.4, 1.6 Hz, 2H), 7.21 (d,  $J$  = 8.4 Hz, 2H), 5.06 (d,  $J$  = 3.2 Hz, 1H), 4.78 – 4.70 (m, 1H), 4.47 – 4.38 (m, 1H), 3.88 (s, 3H), 3.77 (s, 3H).  $^{13}\text{C}$  NMR (151 MHz,  $\text{CDCl}_3$ )  $\delta$  134.43, 132.92, 132.34, 131.15, 131.09, 130.95, 130.89, 130.74, 130.32, 130.13, 129.47, 129.40, 129.04, 128.59, 128.51, 122.45, 122.05, 122.00, 75.67, 55.45, 55.45, 45.46, 45.04.  $^{31}\text{P}$  NMR (243 MHz,  $\text{CDCl}_3$ )  $\delta$  29.53.

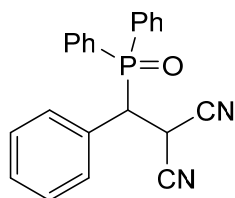

**5a** 2-((diphenylphosphoryl)(phenyl)methyl) malononitrile

White solid, yield: 163mg, 92%;  $^1\text{H}$  NMR (400 MHz, Chloroform-*d*)  $\delta$  8.05 – 7.97 (m, 2H), 7.72 – 7.60 (m, 3H), 7.56 – 7.49 (m, 2H), 7.45 – 7.39 (m, 3H), 7.31 (td,  $J$  = 5.2, 4.8, 3.2 Hz, 5H), 4.78 (t,  $J$  = 7.6 Hz, 1H), 4.09 (s, 1H).  $^{13}\text{C}$  NMR (151 MHz,  $\text{CDCl}_3$ )  $\delta$  134.43, 132.92, 132.34, 131.15, 131.09, 130.95, 130.89, 130.74, 130.32, 130.13, 129.47, 129.40, 129.04, 128.59, 128.51, 111.14, 111.09, 111.05, 75.67, 45.46, 45.04, 24.31.  $^{31}\text{P}$  NMR (243 MHz,  $\text{CDCl}_3$ )  $\delta$  29.53.

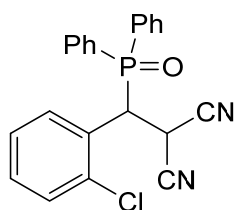

**5b** 2-((2-chlorophenyl) (diphenylphosphoryl)methyl) malononitrile

White solid, yield: 173mg, 89%;  $^1\text{H}$  NMR (400 MHz, DMSO-*d*<sub>6</sub>)  $\delta$  8.20 – 8.12 (m, 2H), 7.99 (d,  $J$  = 8.0 Hz, 1H), 7.76 – 7.64 (m, 3H), 7.50 (dd,  $J$  = 11.6, 7.6 Hz, 2H), 7.42 (t,  $J$  = 7.2 Hz, 2H), 7.36 – 7.26 (m, 4H), 5.66 (dd,  $J$  = 8.4, 6.8 Hz, 1H), 5.22 – 5.15 (m, 1H).  $^{13}\text{C}$  NMR (151 MHz, DMSO)  $\delta$  134.63, 134.19, 133.99, 133.45, 132.74, 132.28, 132.20, 131.84, 131.78, 130.97, 130.76, 130.28, 130.14, 129.68, 129.60, 129.24, 129.16, 128.81, 128.73, 113.20, 113.13, 112.01, 111.91, 42.11, 41.83, 25.05.  $^{31}\text{P}$  NMR (243 MHz, DMSO)  $\delta$  29.01.

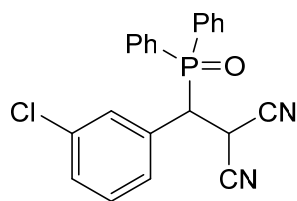

**5c** (2-((3-chlorophenyl) (diphenylphosphoryl)methyl) malononitrile)

White solid, yield: 165mg, 85%;  $^1\text{H}$  NMR (400 MHz, Chloroform-*d*)  $\delta$  8.02 (dd,  $J$  = 11.6, 7.6 Hz, 2H), 7.75 – 7.63 (m, 3H), 7.59 – 7.44 (m, 3H), 7.36 (d,  $J$  = 7.2 Hz, 5H), 7.27 (d,  $J$  = 8.0 Hz, 1H), 4.74 (s, 1H), 4.03 (t,  $J$  = 7.6 Hz, 1H).  $^{13}\text{C}$  NMR (151 MHz,  $\text{CDCl}_3$ )  $\delta$  135.15, 133.43, 131.32, 131.30, 131.20, 131.18, 130.53, 129.87, 129.65, 129.48, 129.41, 128.65, 128.57, 127.72, 110.94, 110.93, 47.07, 46.67, 24.62.  $^{31}\text{P}$  NMR (243 MHz,  $\text{CDCl}_3$ )  $\delta$  28.36.

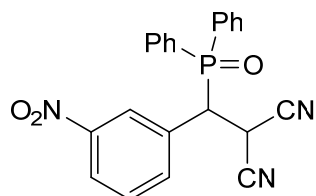

**5d** (2-((3-nitrophenyl) (diphenylphosphoryl)methyl) malononitrile)

White solid, yield: 164mg, 82%;  $^1\text{H}$  NMR (400 MHz, Chloroform-*d*)  $\delta$  8.19 (d,  $J$  = 8.8 Hz, 2H), 8.09 – 8.02 (m, 2H), 7.96 (d,  $J$  = 7.6 Hz, 1H), 7.71 (ddd,  $J$  = 18.8, 7.6, 2.4 Hz, 3H), 7.57 (ddd,  $J$  = 11.2, 8.0, 2.0 Hz, 3H), 7.44 (d,  $J$  = 7.2 Hz, 1H), 7.35 (td,  $J$  = 7.6, 3.2 Hz, 2H), 4.75 (s, 1H), 4.20 (t,  $J$  = 7.2 Hz, 1H).  $^{13}\text{C}$  NMR (151 MHz,  $\text{CDCl}_3$ )  $\delta$  135.18, 133.71, 133.09, 132.91, 131.33, 131.27, 130.95, 130.89, 130.47, 129.67, 129.59, 128.91, 128.83, 125.11, 124.25, 110.68, 46.98, 46.57, 29.71, 24.47.  $^{31}\text{P}$  NMR (243 MHz,  $\text{CDCl}_3$ )  $\delta$  28.24.

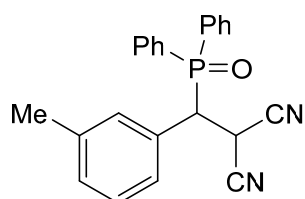

**5e** (2-((3-methylphenyl) (diphenylphosphoryl)methyl) malononitrile)

White solid, yield: 157mg, 85%;  $^1\text{H}$  NMR (400 MHz, Chloroform-*d*)  $\delta$  8.03 – 7.97 (m, 2H), 7.66 (dtd,  $J$  = 14.8, 7.2, 2.4 Hz, 3H), 7.55 – 7.48 (m, 2H), 7.43 (dd,  $J$  = 7.6, 1.6 Hz, 1H), 7.33 (dd,  $J$  = 7.6, 3.6 Hz, 2H), 7.22 – 7.11 (m, 4H), 4.83 (s, 1H), 4.03 (t,  $J$  = 8.0 Hz, 1H), 2.28 (s, 3H).  $^{13}\text{C}$  NMR (151 MHz,  $\text{CDCl}_3$ )  $\delta$  133.17, 132.69, 132.37, 131.36, 130.58, 130.30, 130.13, 129.30, 129.22, 129.12, 128.88, 128.35, 128.27, 126.77, 111.31, 111.30, 47.42, 47.00, 24.70, 21.30.  $^{31}\text{P}$  NMR (243 MHz,  $\text{CDCl}_3$ )  $\delta$  28.64.

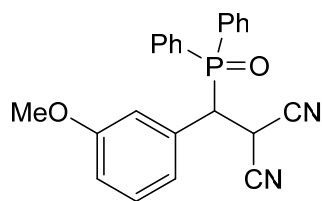

**5f** 2-((diphenylphosphoryl)(3-methoxyphenyl) methyl) malononitrile

White solid, yield: 156mg, 81%;  $^1\text{H}$  NMR (400 MHz, Chloroform-*d*)  $\delta$  8.04 – 7.95 (m, 2H), 7.71 – 7.53 (m, 5H), 7.45 (d,  $J$  = 1.6 Hz, 1H), 7.33 (d,  $J$  = 3.2 Hz, 2H), 7.22 (d,  $J$  = 8.0 Hz, 1H), 7.01 – 6.92 (m, 2H), 6.86 (dd,  $J$  = 8.4, 2.4 Hz, 1H), 4.77 (s, 1H), 4.05 (t,  $J$  = 8.0 Hz, 1H), 3.73 (s, 3H).  $^{13}\text{C}$  NMR (151 MHz,  $\text{CDCl}_3$ )  $\delta$  133.20, 132.46, 132.03, 131.36, 131.36, 130.31, 129.65, 129.35, 129.27, 128.85, 128.45, 128.46, 128.38, 122.08, 115.48, 114.83, 111.28, 55.29, 47.43, 47.01, 24.78.  $^{31}\text{P}$  NMR (243 MHz,  $\text{CDCl}_3$ )  $\delta$  30.84.

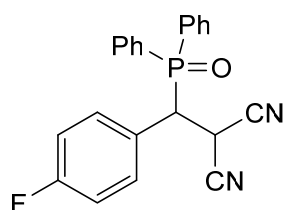

**5g** 2-((diphenylphosphoryl)(4-fluorophenyl) methyl) malononitrile

White solid, yield: 145mg, 78%;  $^1\text{H}$  NMR (400 MHz,  $\text{DMSO}-d_6$ )  $\delta$  8.17 – 8.09 (m, 2H), 7.69 – 7.62 (m, 5H), 7.53 (s, 4H), 7.44 – 7.32 (m, 3H), 5.46 (t,  $J$  = 7.3 Hz, 1H), 5.17 (t,  $J$  = 7.1 Hz, 1H).  $^{13}\text{C}$  NMR (151 MHz,  $\text{DMSO}$ )  $\delta$  133.11, 132.60, 132.46, 132.39, 132.32, 131.88, 131.62, 131.56, 131.37, 131.30, 130.82, 130.76, 130.16, 130.10, 129.49, 129.42, 128.87, 128.79, 116.00, 115.85, 115.09, 114.95, 113.17, 112.93, 79.57, 79.35, 79.14, 42.23, 41.80, 25.47.  $^{31}\text{P}$  NMR (243 MHz,  $\text{DMSO}$ )  $\delta$  28.58.  $^{19}\text{F}$  NMR (565 MHz,  $\text{DMSO}$ )  $\delta$  -112.90.

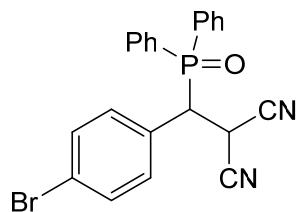

**5h** 2-((4-bromophenyl) (diphenylphosphoryl)methyl) malononitrile

White solid, yield: 171mg, 79%;  $^1\text{H}$  NMR (400 MHz, Chloroform-*d*)  $\delta$  8.03 – 7.97 (m, 2H), 7.83 – 7.50 (m, 7H), 7.44 (dtd,  $J$  = 8.4, 3.9, 2.0 Hz, 3H), 7.35 (td,  $J$  = 7.6, 3.2 Hz, 1H), 7.02 (t,  $J$  = 8.6 Hz, 1H), 4.69 (t,  $J$  = 7.2 Hz, 1H), 4.05 (t,  $J$  = 7.6 Hz, 1H).  $^{13}\text{C}$  NMR (151 MHz,  $\text{CDCl}_3$ )  $\delta$  137.03, 136.79, 133.15, 132.51, 131.97, 131.28, 130.69, 130.43, 130.25, 129.81, 129.27, 128.80, 128.45, 111.89, 111.37, 78.00, 77.95, 42.23, 41.80, 25.47.  $^{31}\text{P}$  NMR (243 MHz,  $\text{CDCl}_3$ )  $\delta$  29.69.



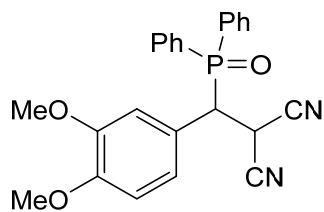

**5i** (2-((3,4-dimethoxyphenyl)(diphenylphosphoryl)methyl) malononitrile)

White solid, yield: 174mg, 84%;  $^1\text{H}$  NMR (400 MHz, Chloroform-*d*)  $\delta$  8.02 – 7.92 (m, 2H), 7.72 – 7.53 (m, 5H), 7.47 (t,  $J$  = 7.6 Hz, 1H), 7.36 (td,  $J$  = 7.6, 2.8 Hz, 2H), 6.96 (d,  $J$  = 5.6 Hz, 2H), 6.82 (d,  $J$  = 8.4 Hz, 1H), 4.73 (s, 1H), 4.04 – 3.96 (m, 1H), 3.88 (s, 3H), 3.77 (s, 3H).  $^{13}\text{C}$  NMR (151 MHz,  $\text{CDCl}_3$ )  $\delta$  139.74, 139.53, 133.21, 132.49, 131.88, 131.31, 131.25, 131.09, 131.04, 130.74, 130.39, 129.73, 129.65, 129.31, 128.94, 128.86, 78.00, 77.95, 47.42, 47.01, 24.70.  $^{31}\text{P}$  NMR (243 MHz,  $\text{CDCl}_3$ )  $\delta$  28.47.

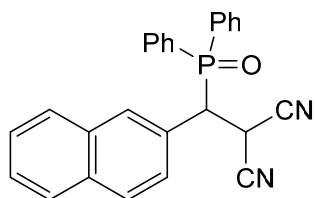

**5j** (2-((diphenylphosphoryl)(naphthalen-2-yl) methyl) malononitrile)

White solid, yield: 142mg, 70%;  $^1\text{H}$  NMR (400 MHz, Chloroform-*d*)  $\delta$  8.03 (dd,  $J$  = 11.6, 7.6 Hz, 2H), 7.91 (s, 1H), 7.81 (t,  $J$  = 9.2 Hz, 4H), 7.73 – 7.61 (m, 3H), 7.58 – 7.46 (m, 5H), 7.25 (td,  $J$  = 7.6, 3.2 Hz, 2H), 4.85 (t,  $J$  = 7.6 Hz, 1H), 4.23 (t,  $J$  = 8.0 Hz, 1H).  $^{13}\text{C}$  NMR (151 MHz,  $\text{CDCl}_3$ )  $\delta$  133.23, 133.11, 132.45, 132.02, 131.35, 131.29, 130.38, 129.72, 129.49, 129.38, 129.31, 129.26, 128.79, 128.46, 128.38, 128.18, 127.72, 127.07, 126.80, 126.48, 111.36, 111.30, 111.21, 47.54, 47.12, 24.97.  $^{31}\text{P}$  NMR (243 MHz,  $\text{CDCl}_3$ )  $\delta$  28.51.

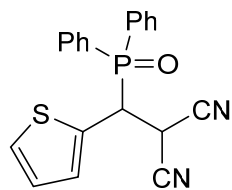

**5k** (2-((diphenylphosphoryl)(thiophen-2-yl) methyl) malononitrile)

White solid, yield: 130mg, 72%;  $^1\text{H}$  NMR (400 MHz, Chloroform-*d*)  $\delta$  7.96 (q,  $J$  = 7.6, 6.4 Hz, 2H), 7.86 – 7.74 (m, 2H), 7.70 (d,  $J$  = 7.2 Hz, 1H), 7.64 (d,  $J$  = 7.6 Hz, 4H), 7.52 (s, 1H), 7.41 (d,  $J$  = 7.2 Hz, 2H), 7.25 (d,  $J$  = 3.2 Hz, 1H), 4.75 (s, 1H), 4.40 (s, 1H).  $^{13}\text{C}$  NMR (151 MHz,  $\text{CDCl}_3$ )  $\delta$  133.37, 132.78, 132.35, 131.89, 131.64, 131.58, 131.41, 131.34, 130.80, 130.68, 129.81, 129.42, 129.34, 129.16, 128.87, 128.55, 128.47, 128.36, 128.16, 127.85, 127.45, 126.82, 111.25, 111.19, 110.96, 110.92, 42.97, 42.54, 25.62.  $^{31}\text{P}$  NMR (243 MHz,  $\text{CDCl}_3$ )  $\delta$  28.36.

# Spectra of Products

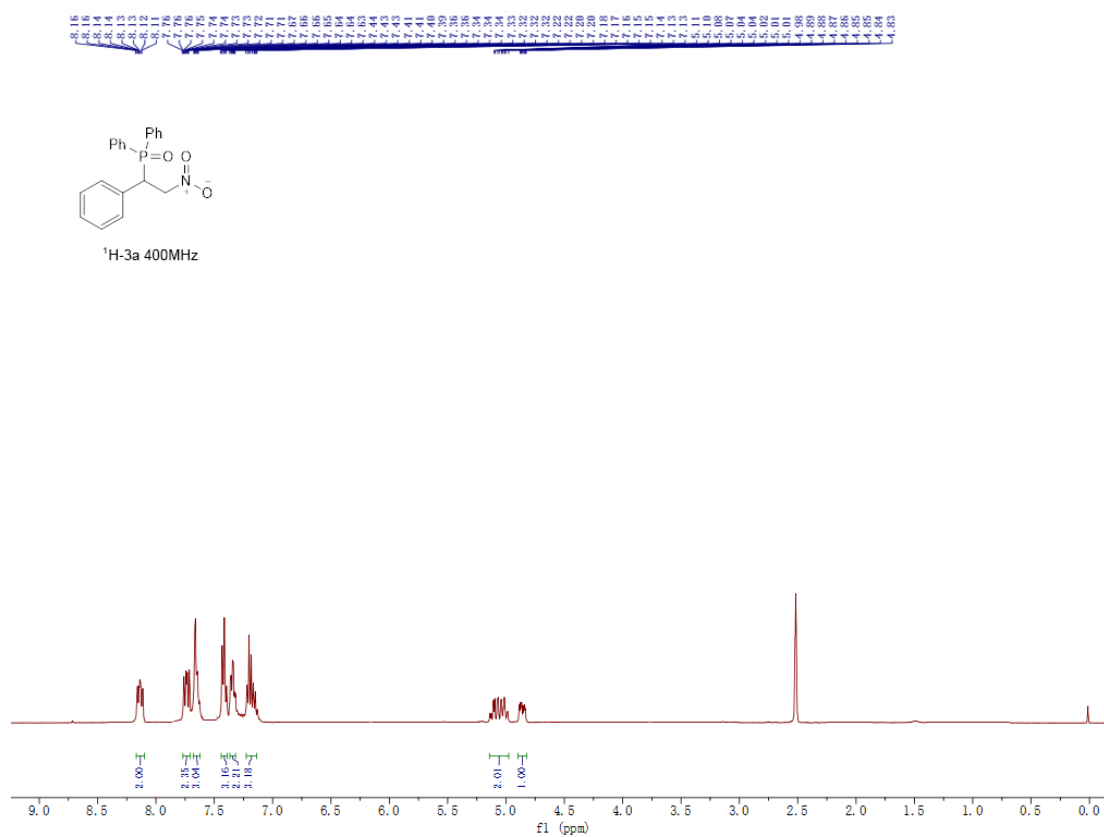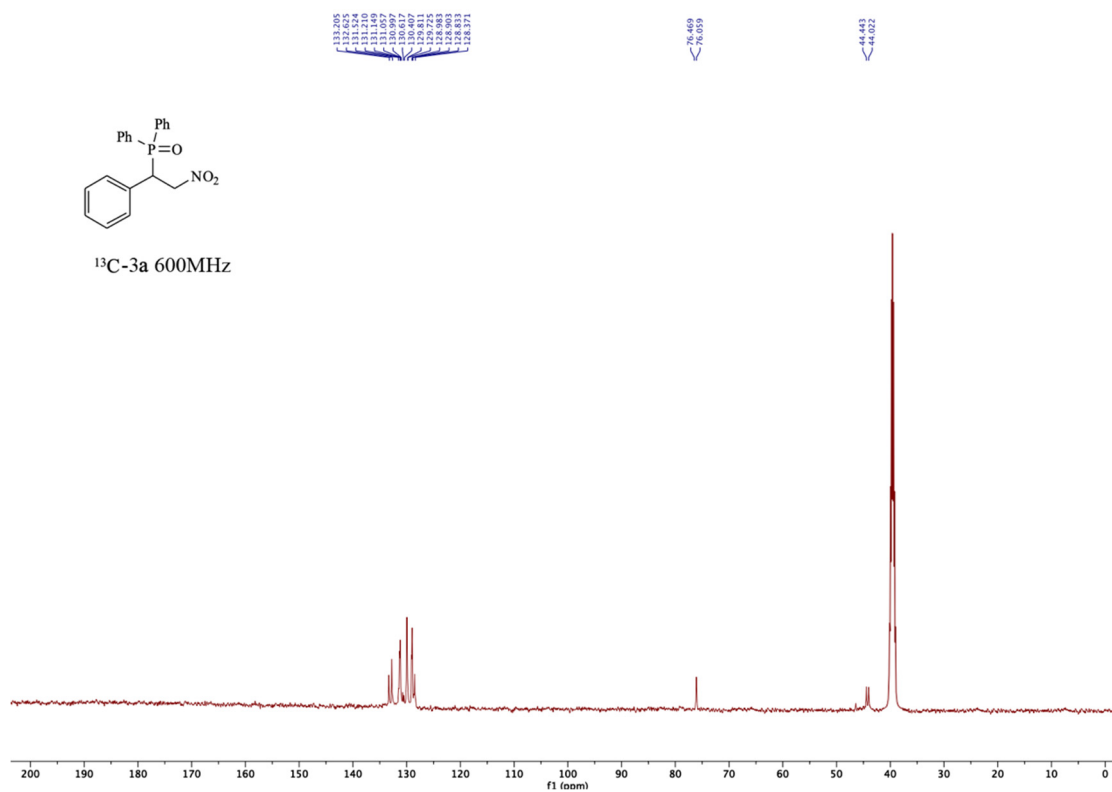

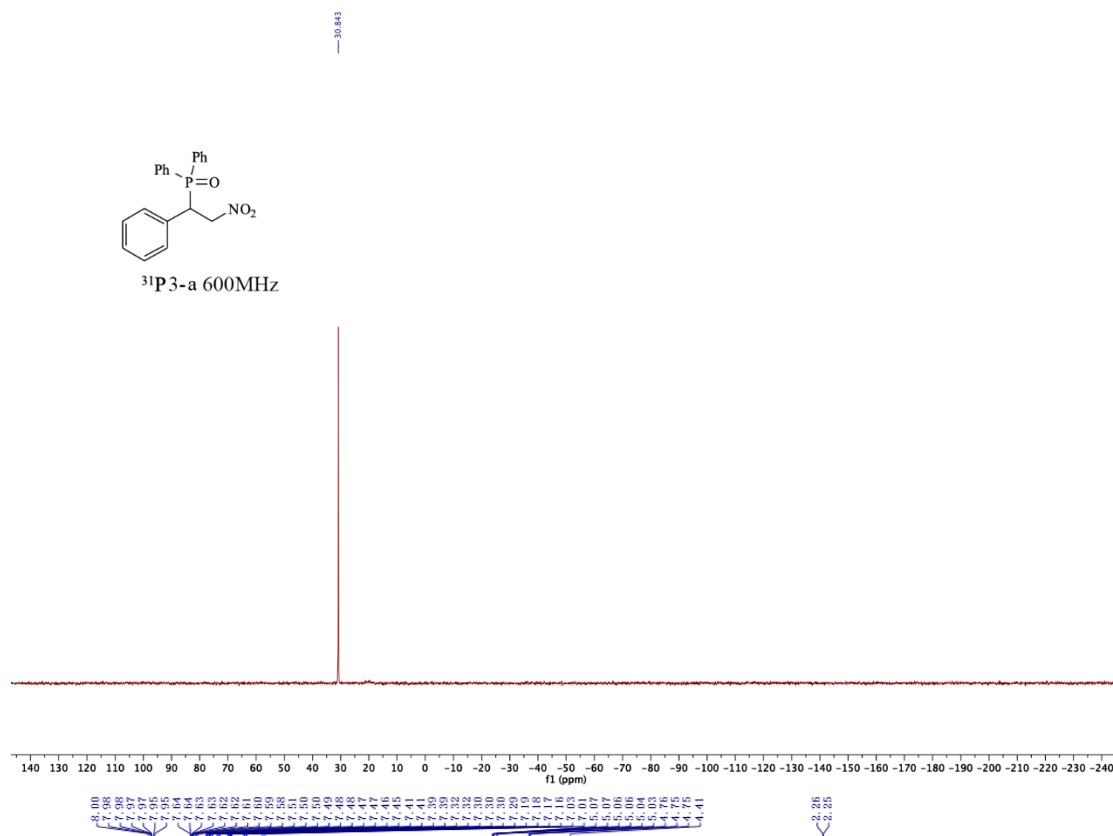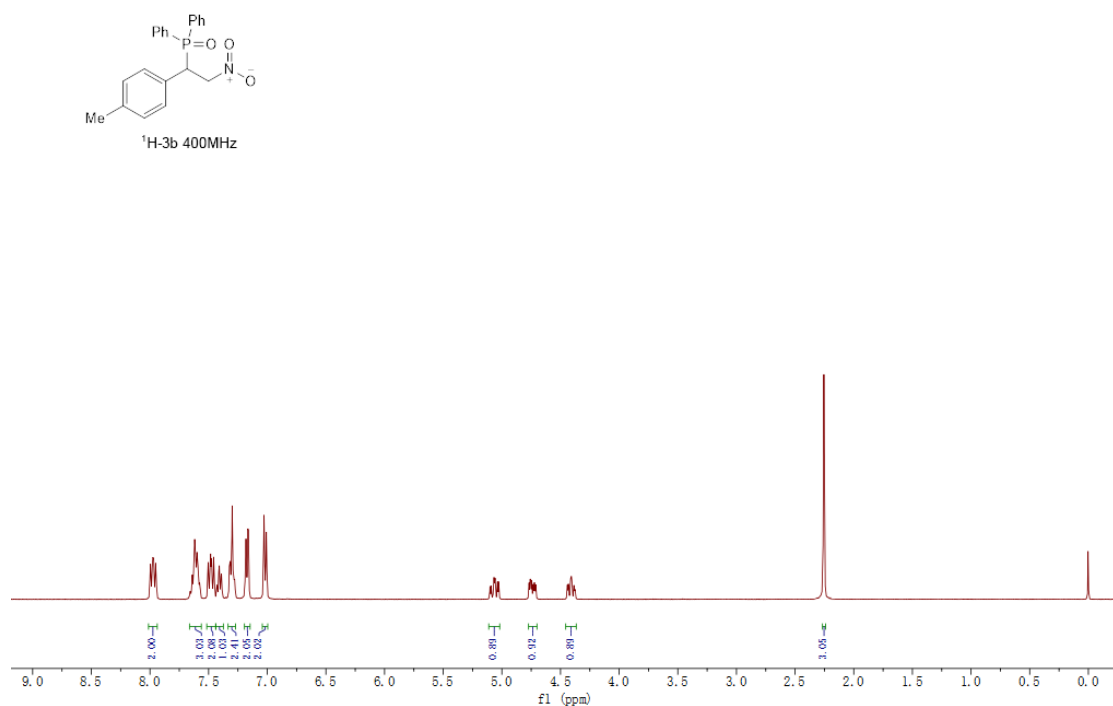

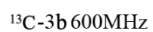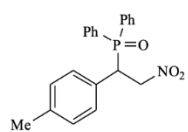<sup>31</sup>P 3-b 600MHz

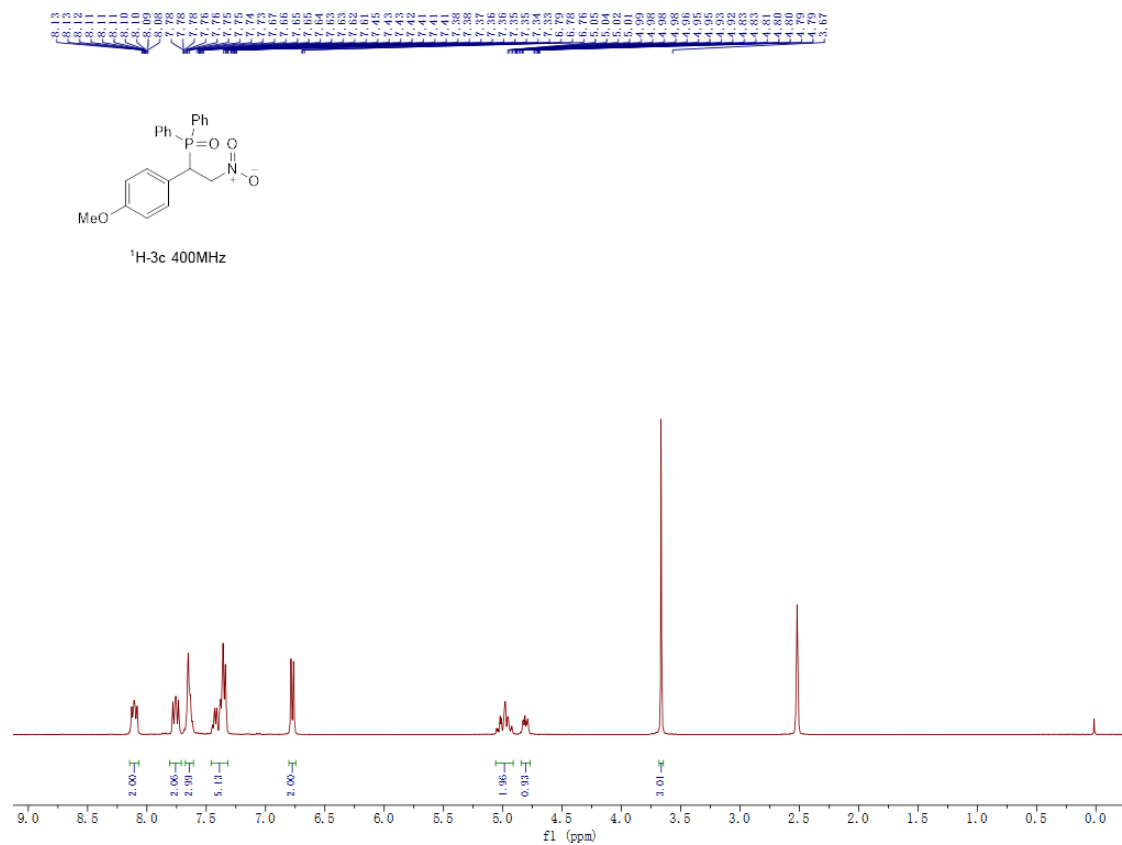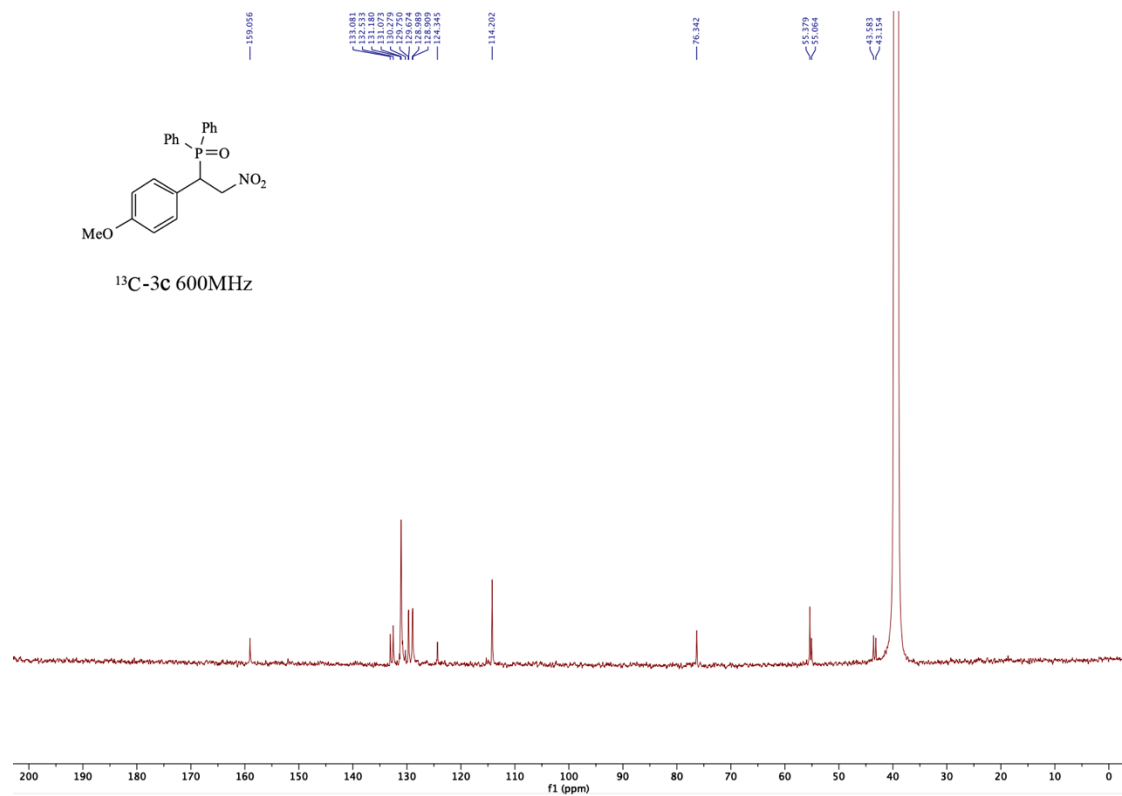

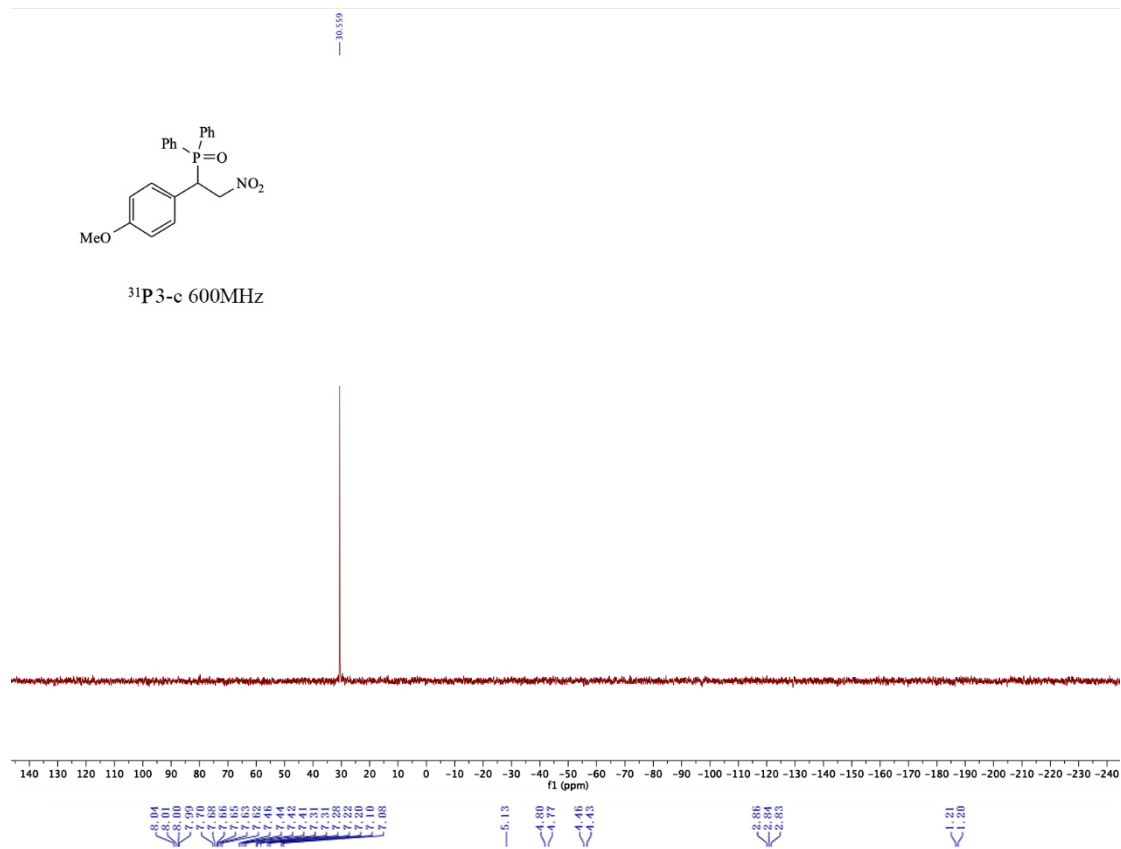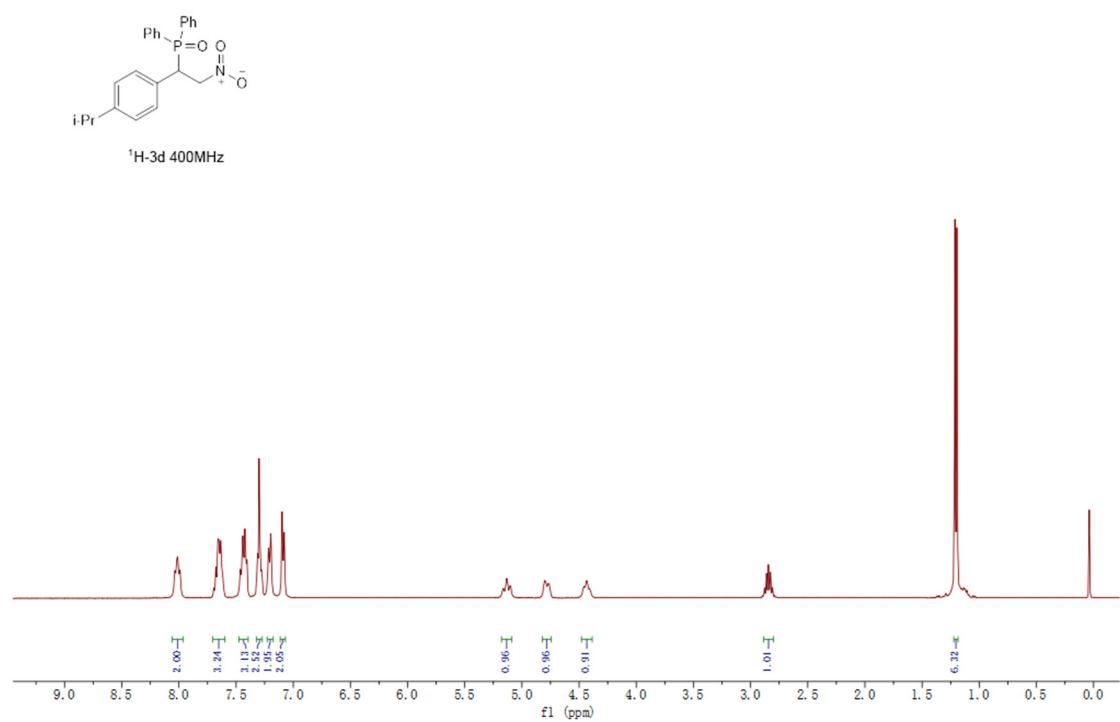

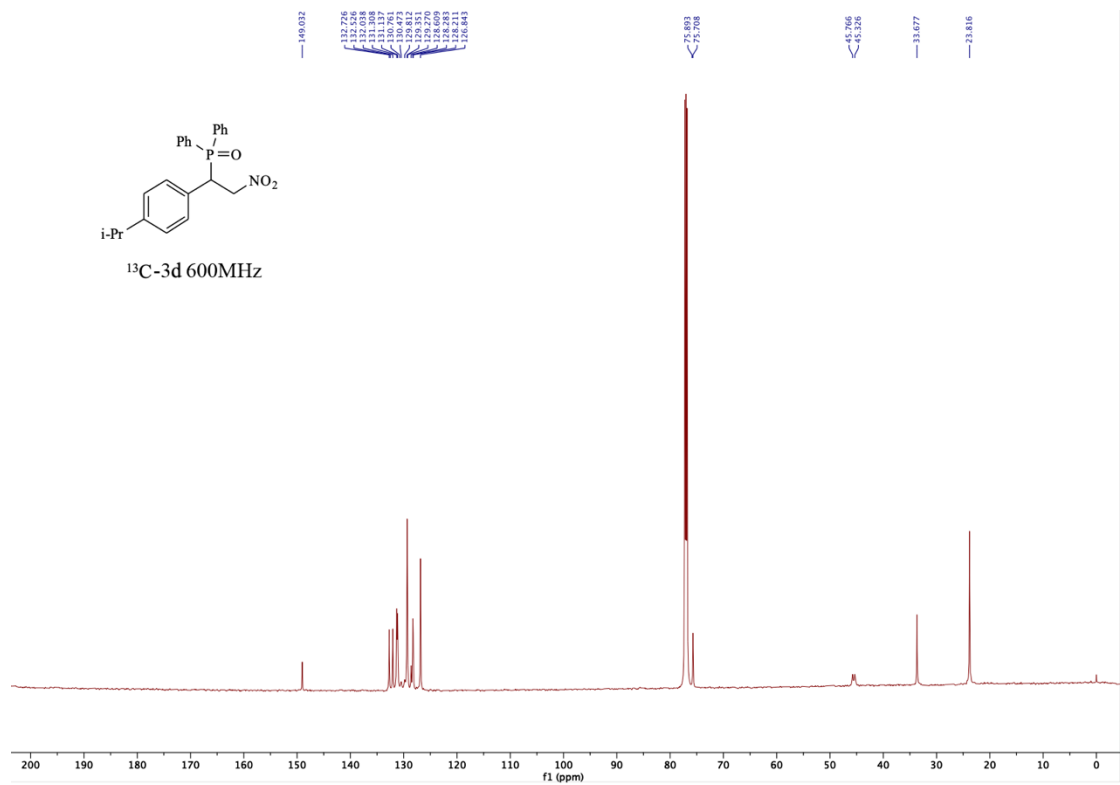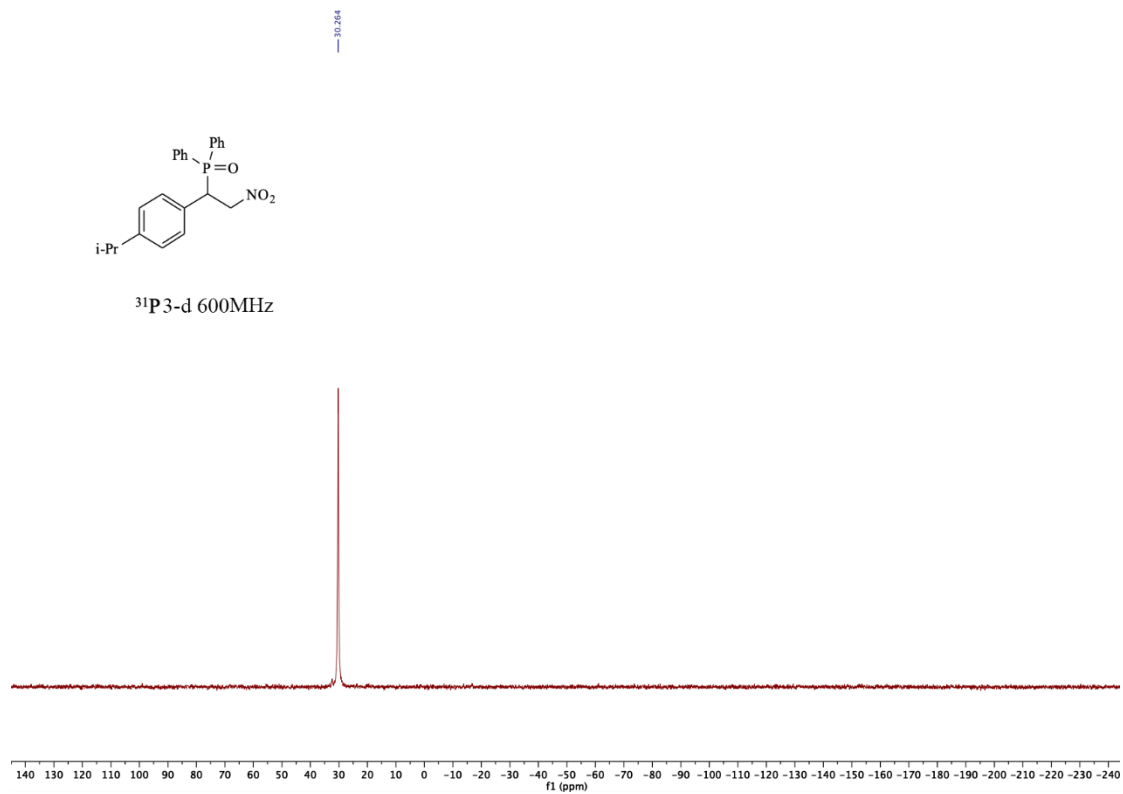





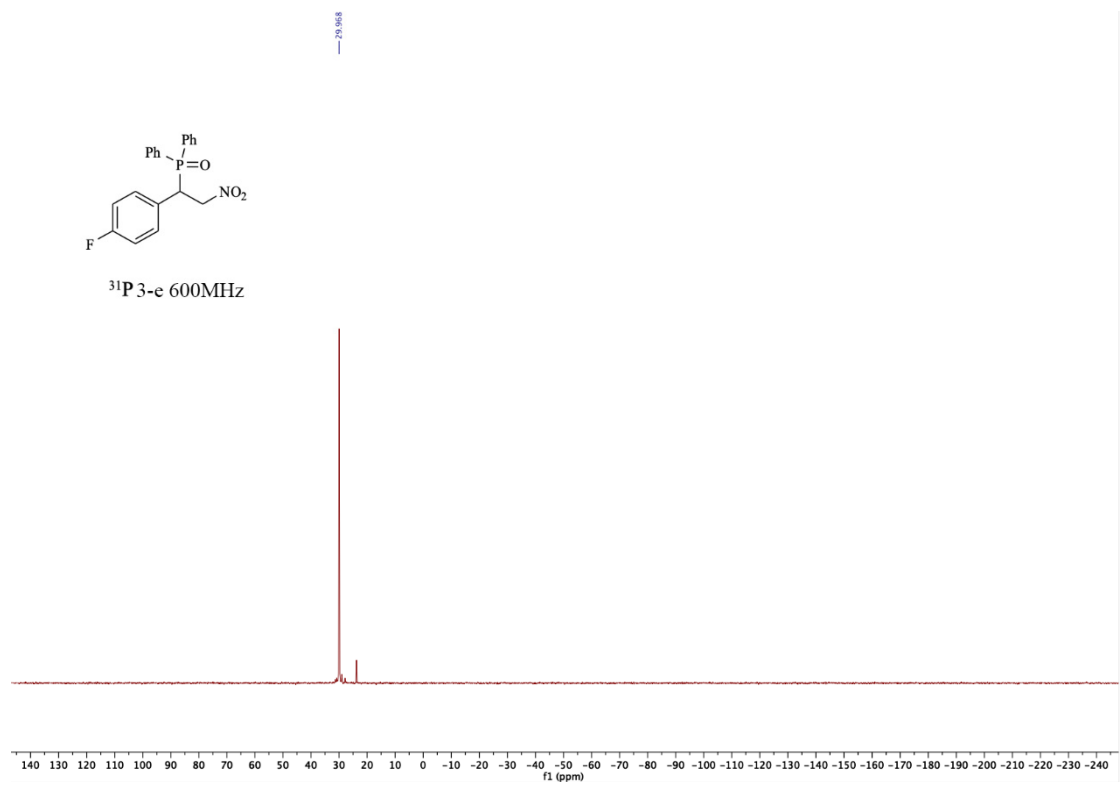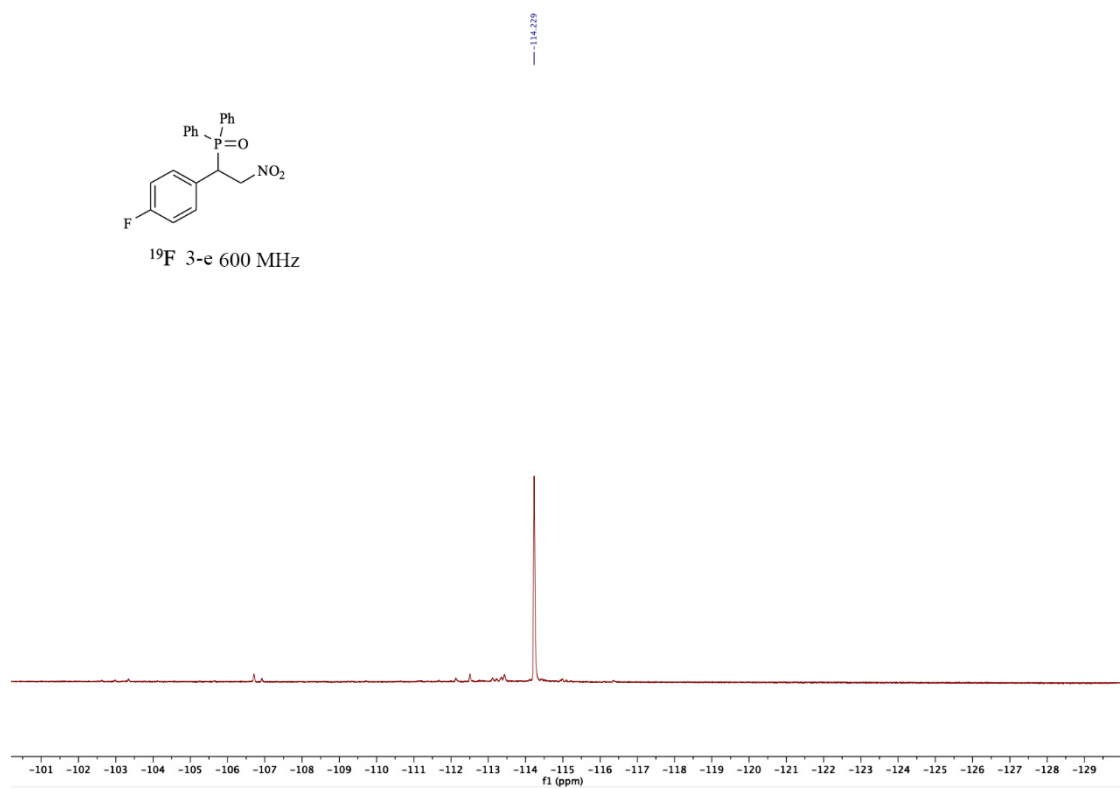

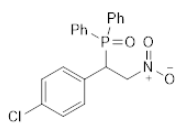<sup>1</sup>H-3f 400MHz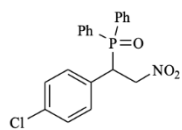<sup>13</sup>C-3f 600MHz

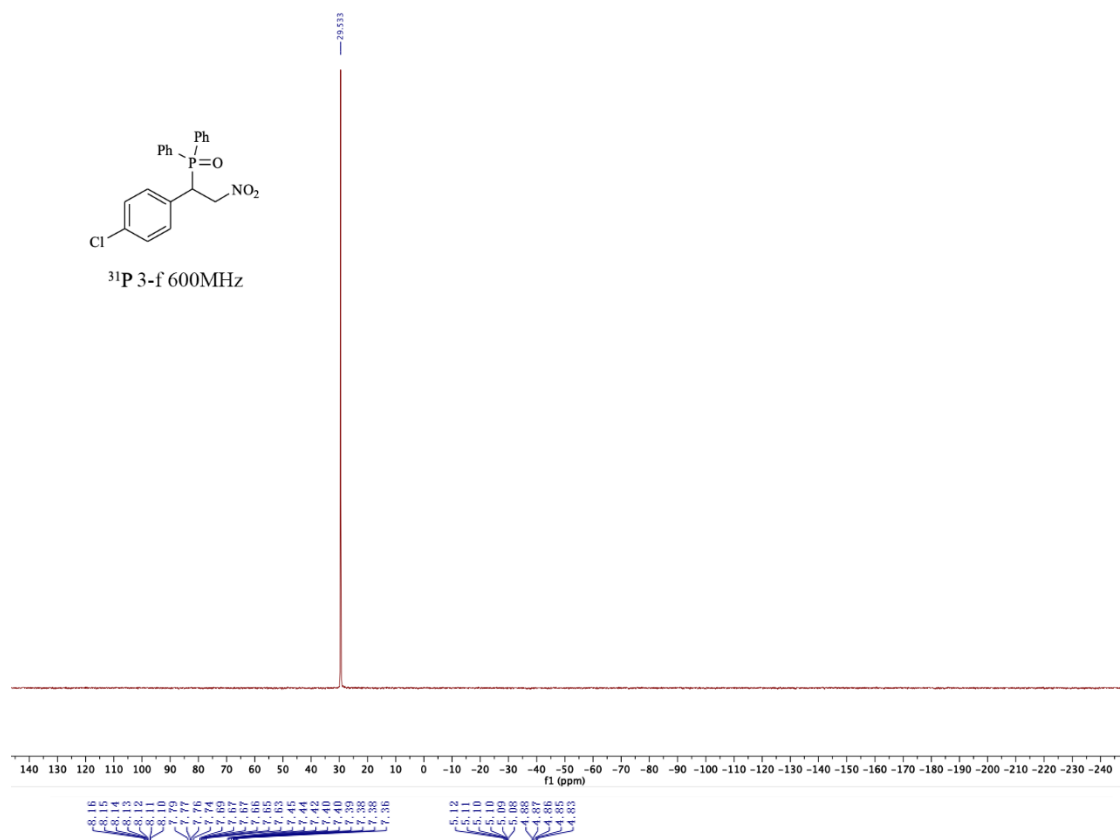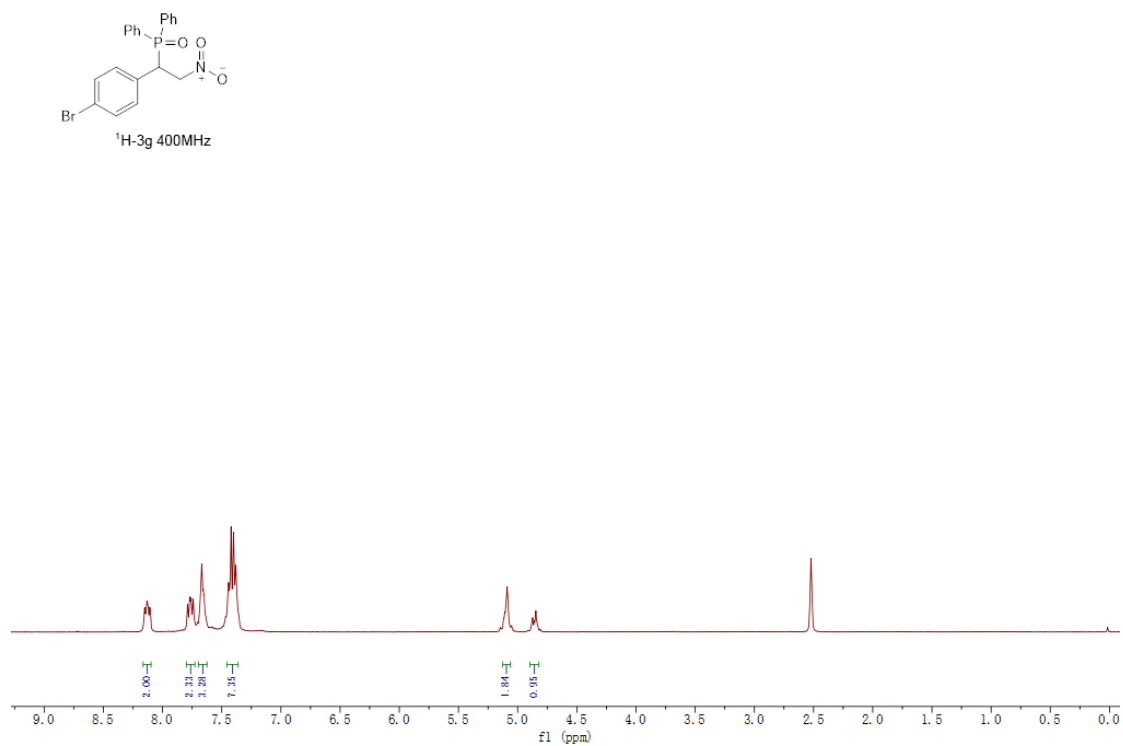

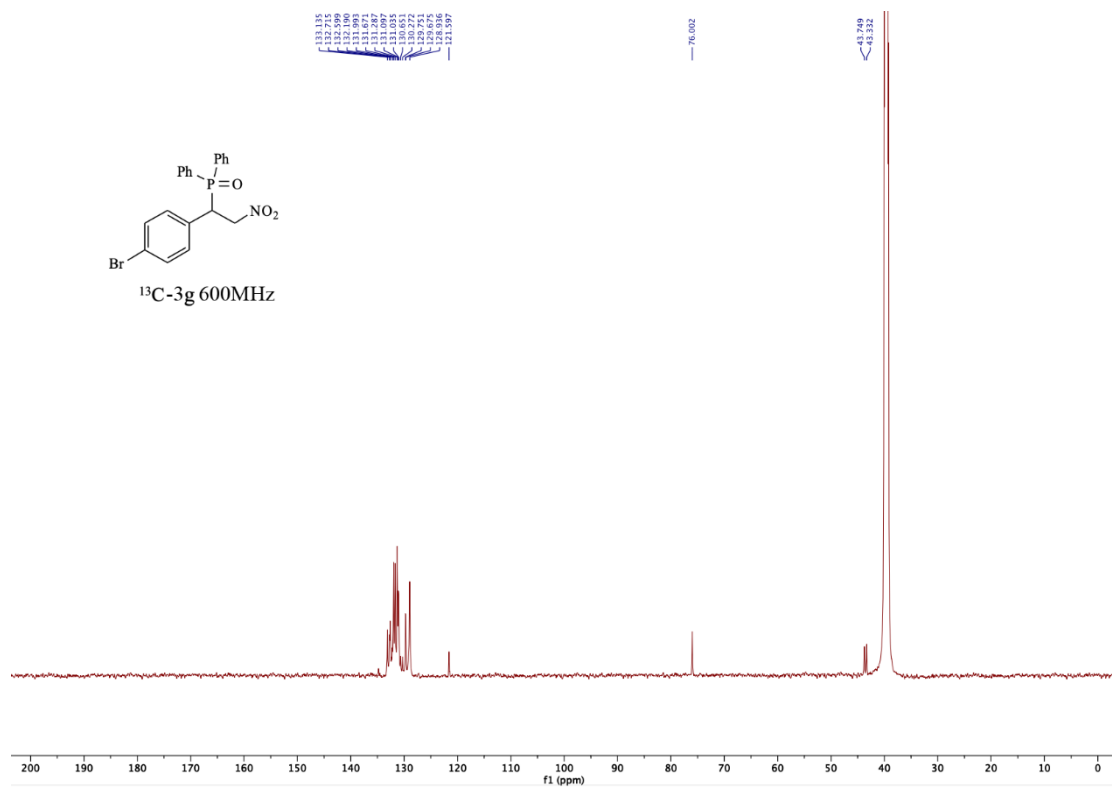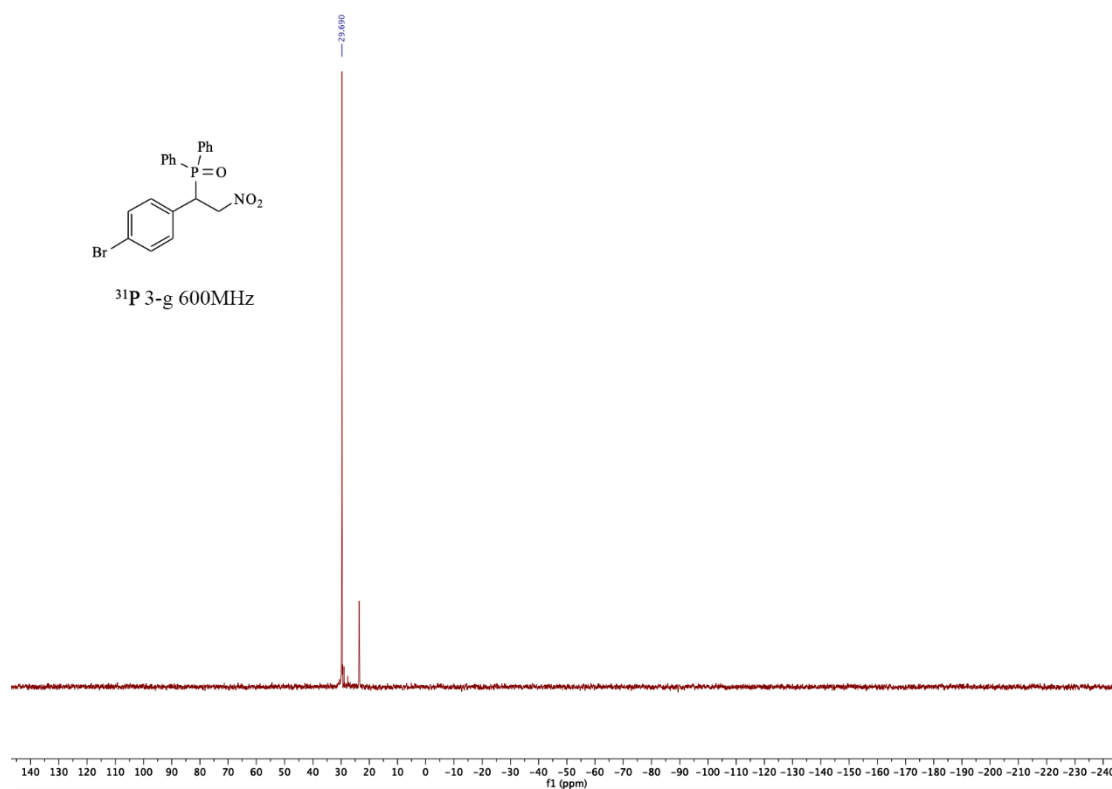

8.12  
8.12  
8.12  
8.10  
8.10  
8.10  
8.09  
8.09  
8.07  
7.90  
7.88  
7.72  
7.71  
7.70  
7.70  
7.69  
7.67  
7.66  
7.65  
7.64  
7.49  
7.48  
7.46  
7.46  
7.43  
7.42  
7.41  
7.40  
7.38  
7.34  
7.33  
7.32  
7.28  
7.27  
7.25  
7.20  
7.18  
5.27  
5.26  
5.24  
5.19  
5.15  
4.82  
4.81  
4.80  
4.79  
4.77  
4.76

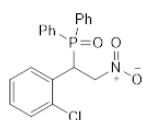

<sup>1</sup>H-3h 400MHz

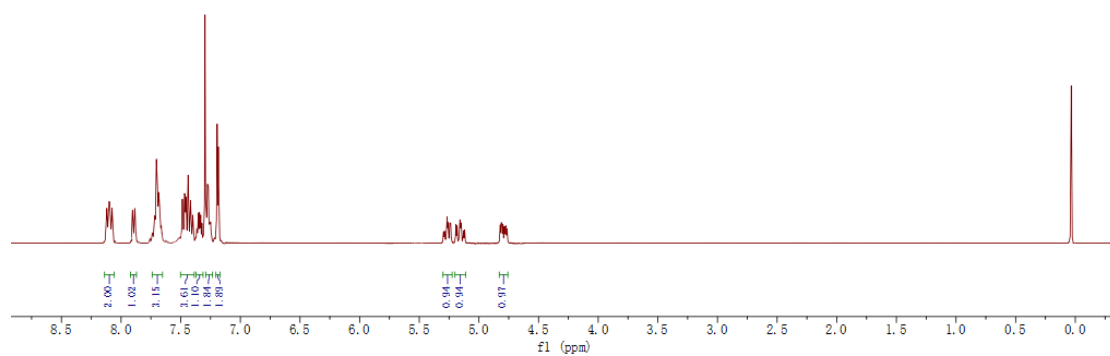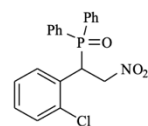

<sup>13</sup>C-3h 600MHz

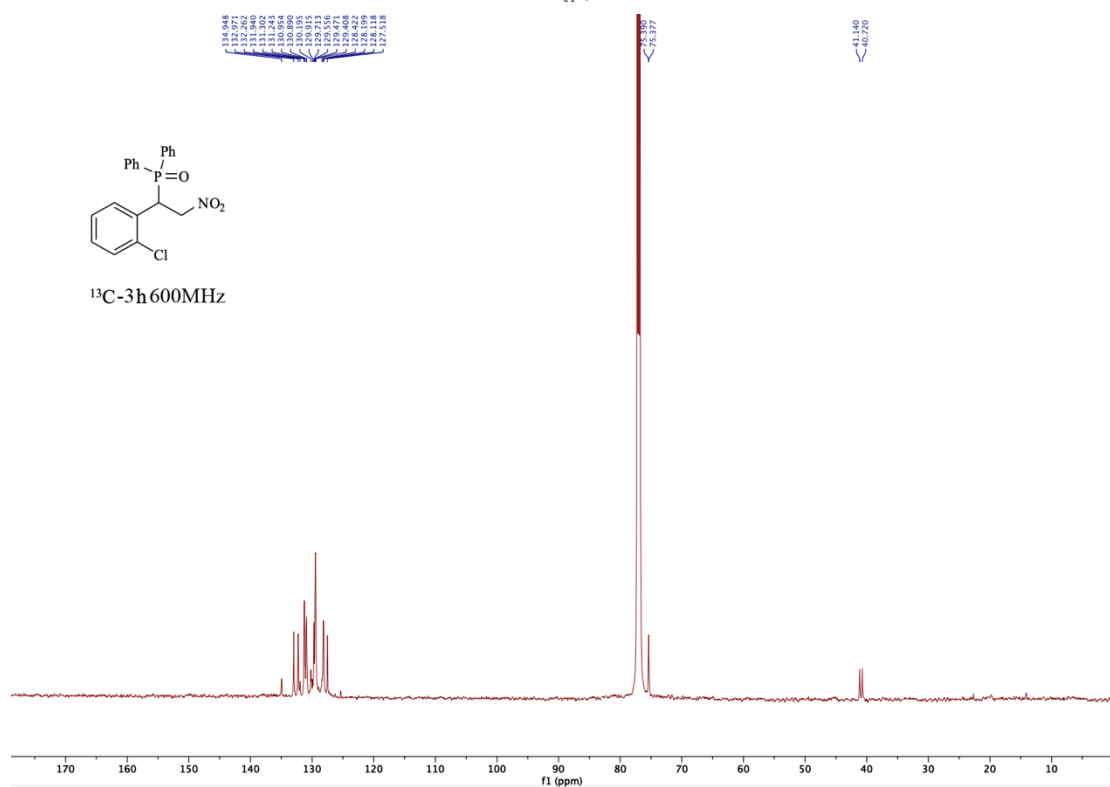

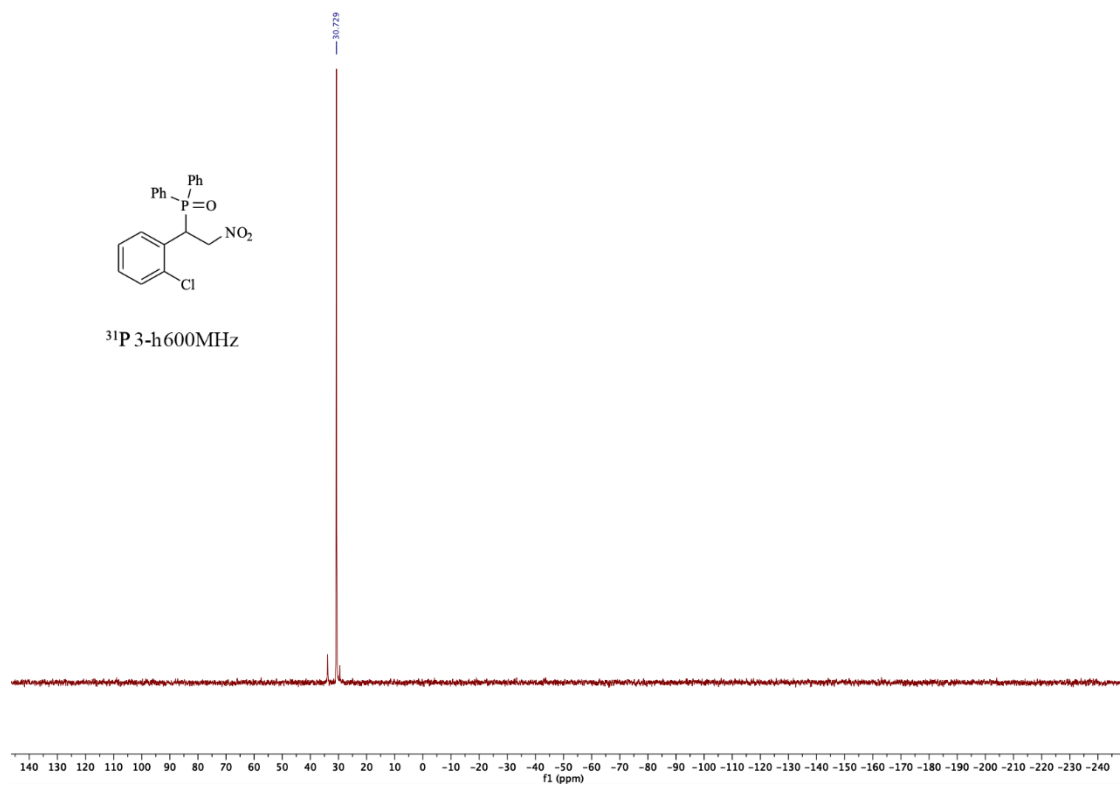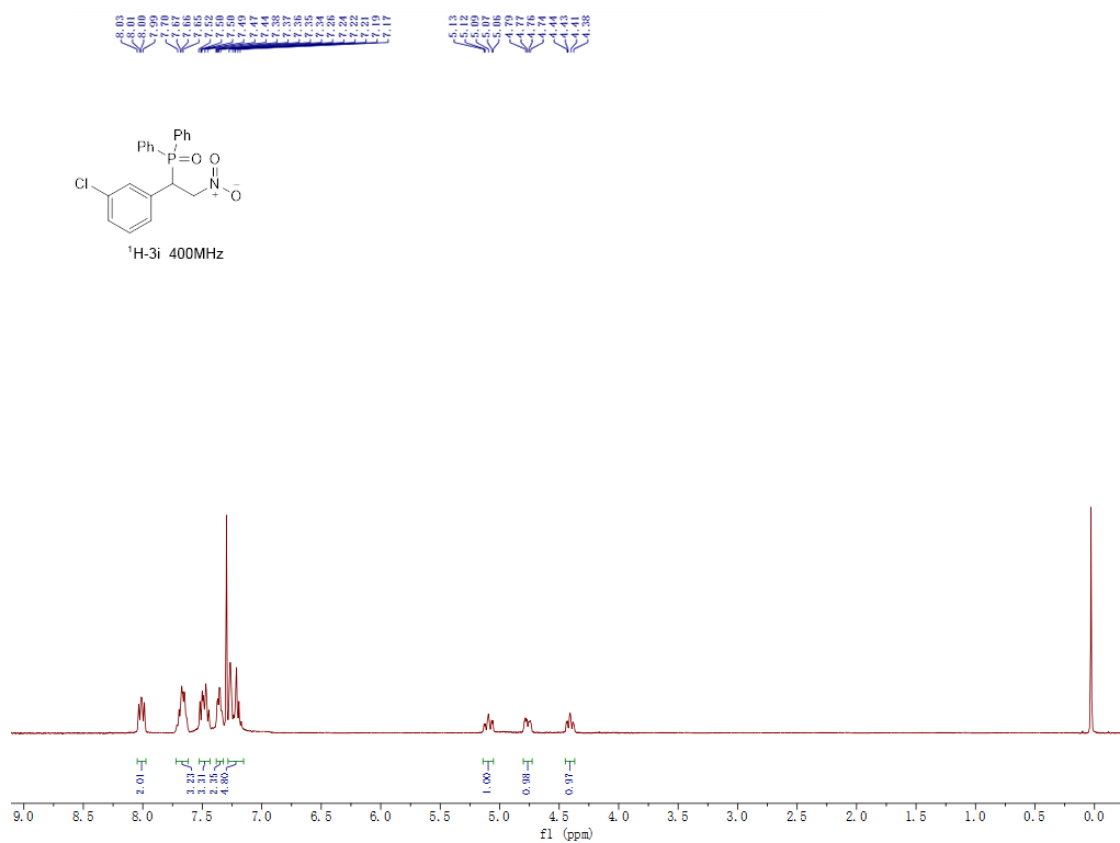

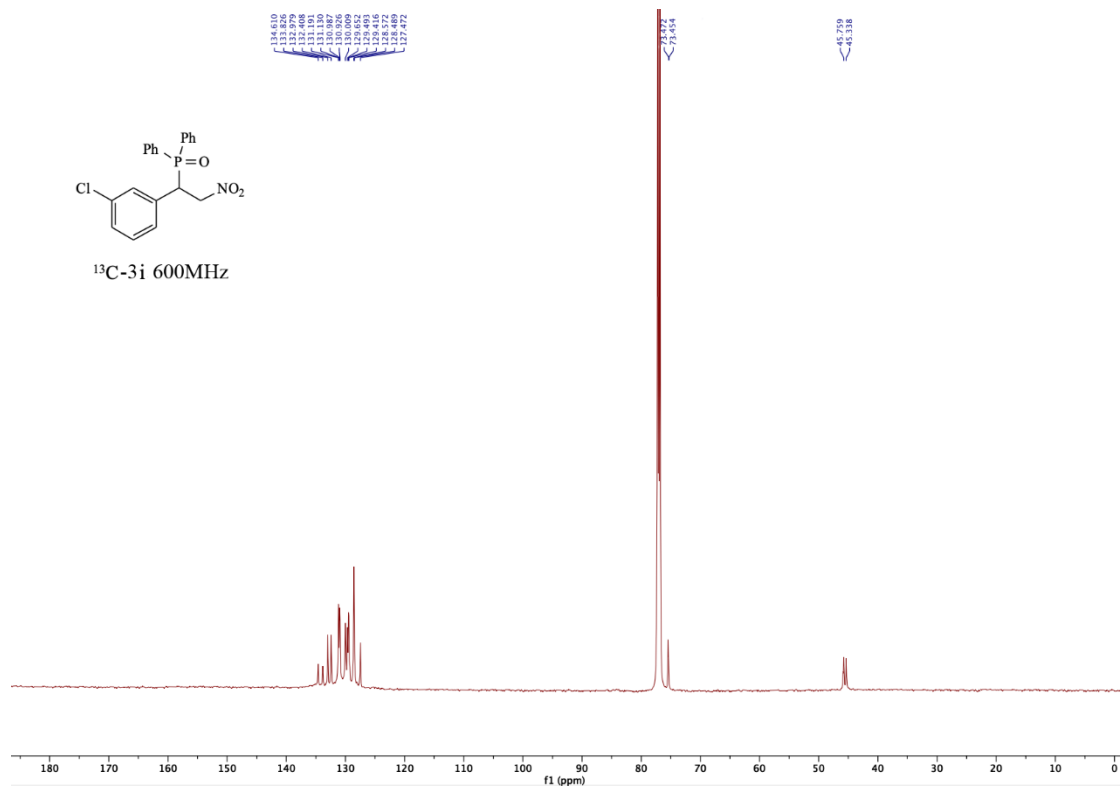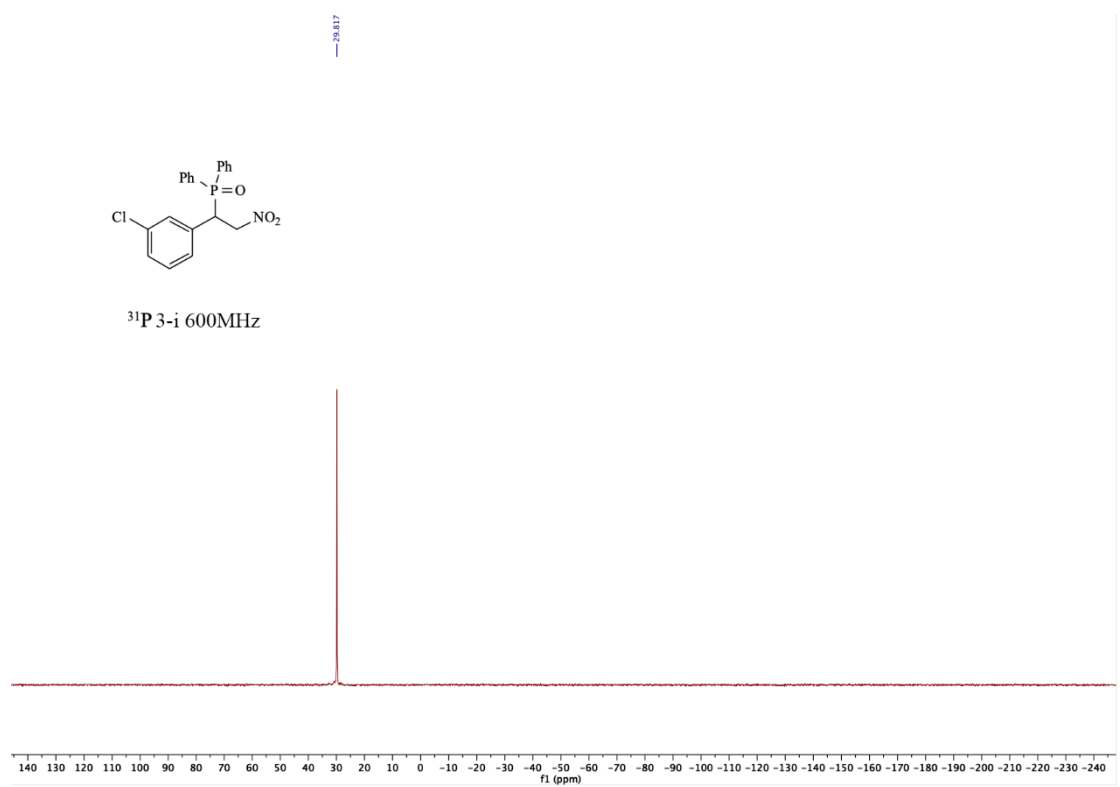

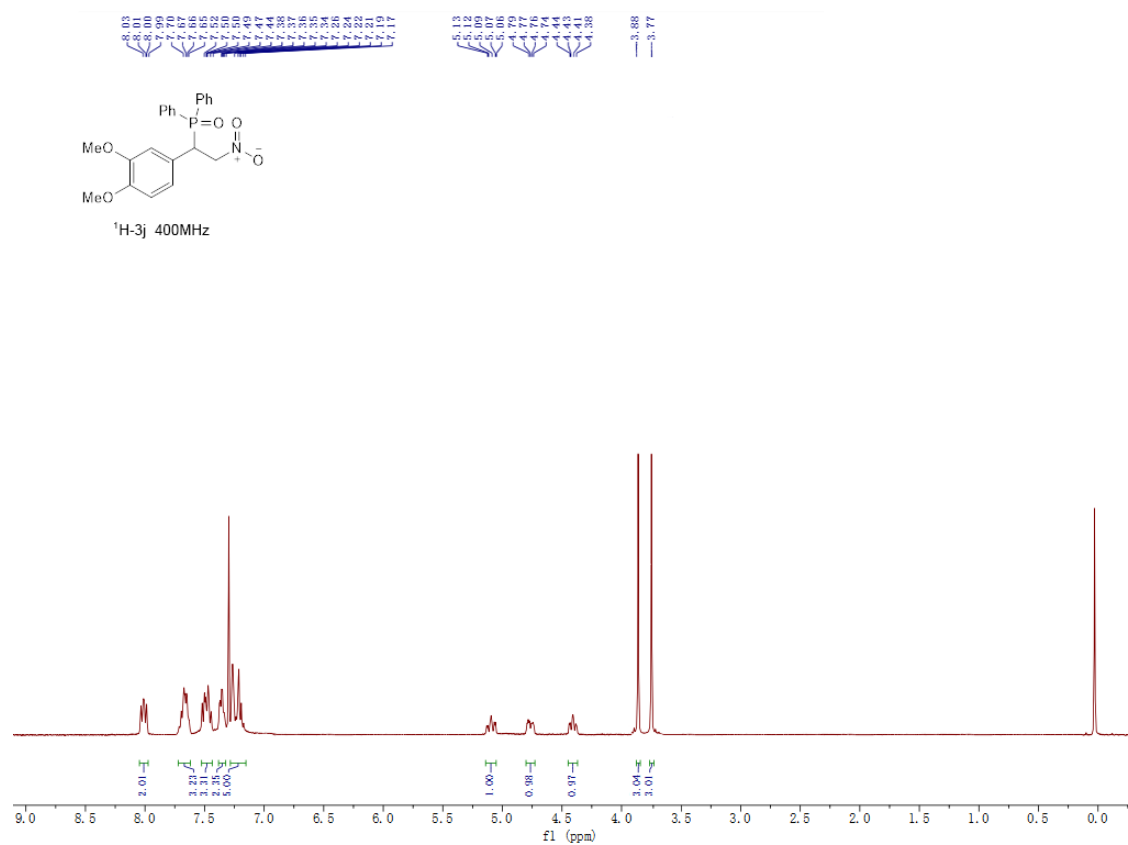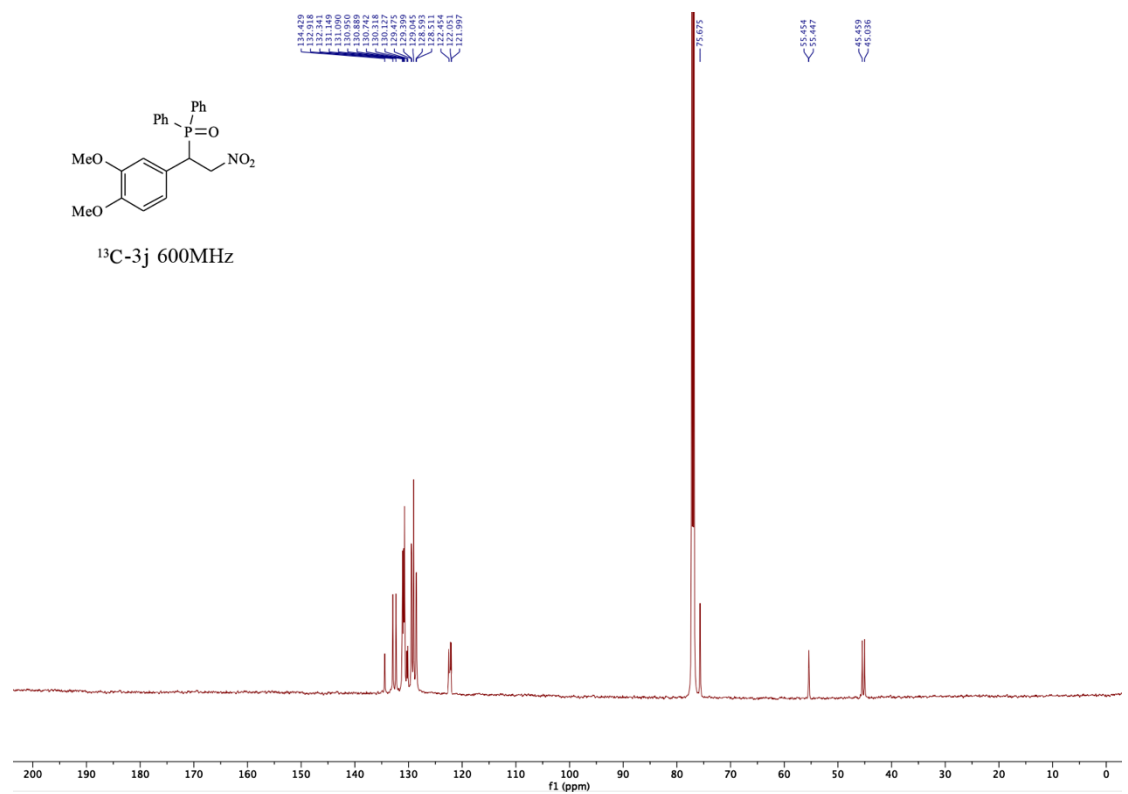



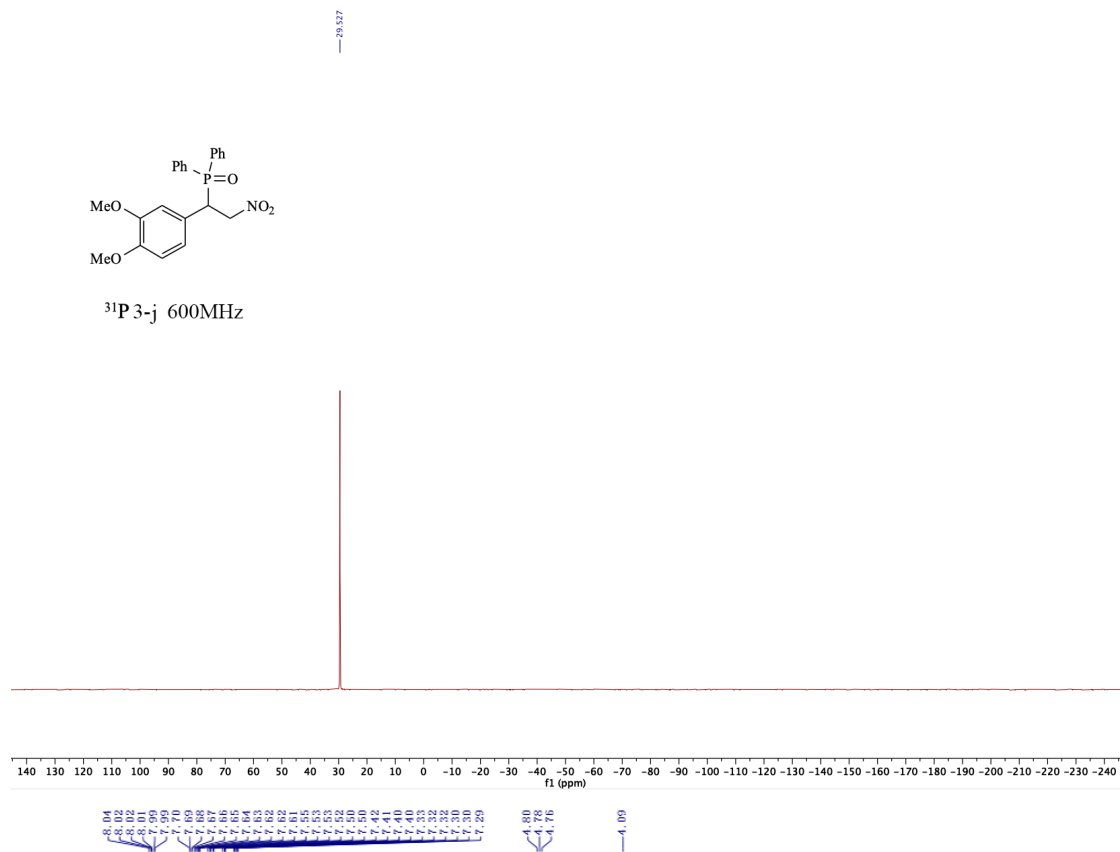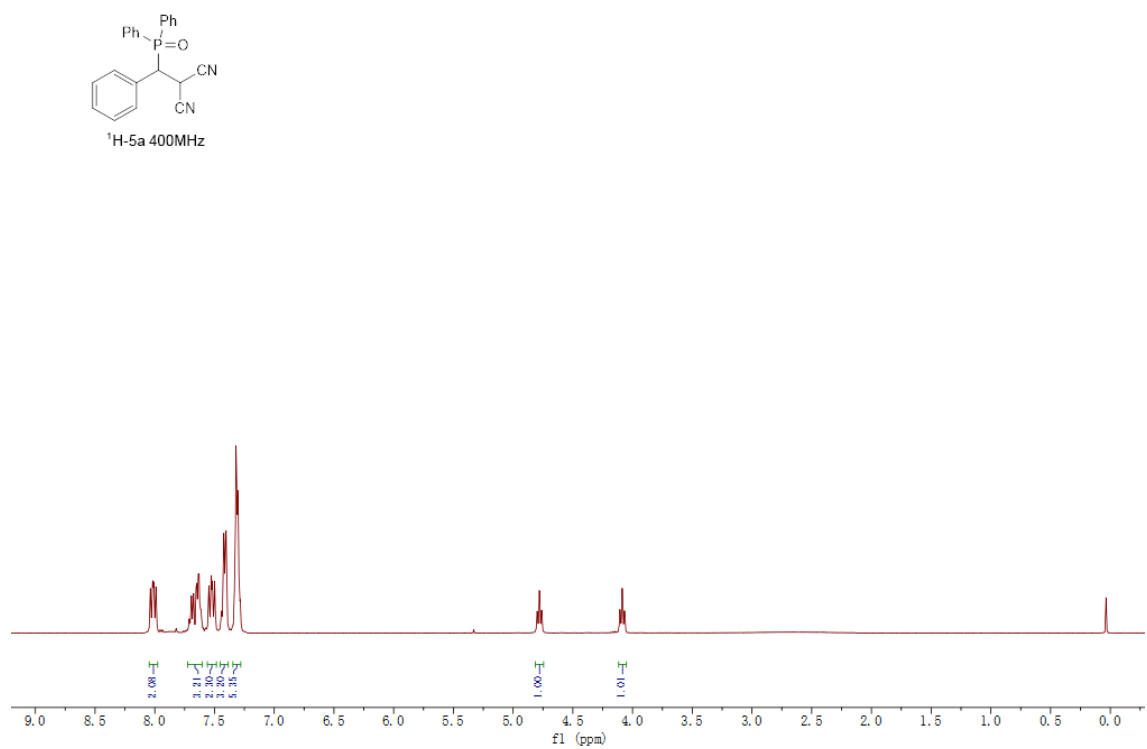

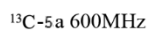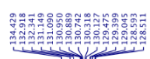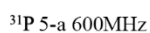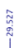

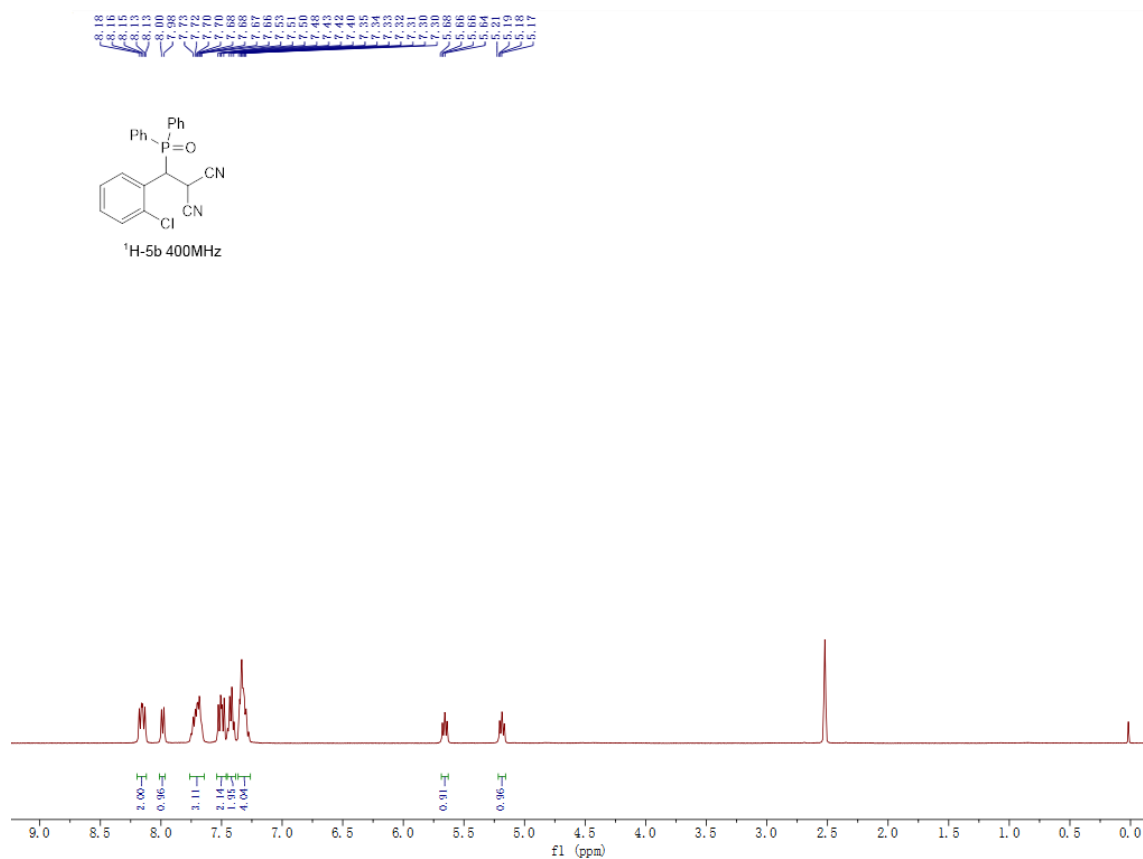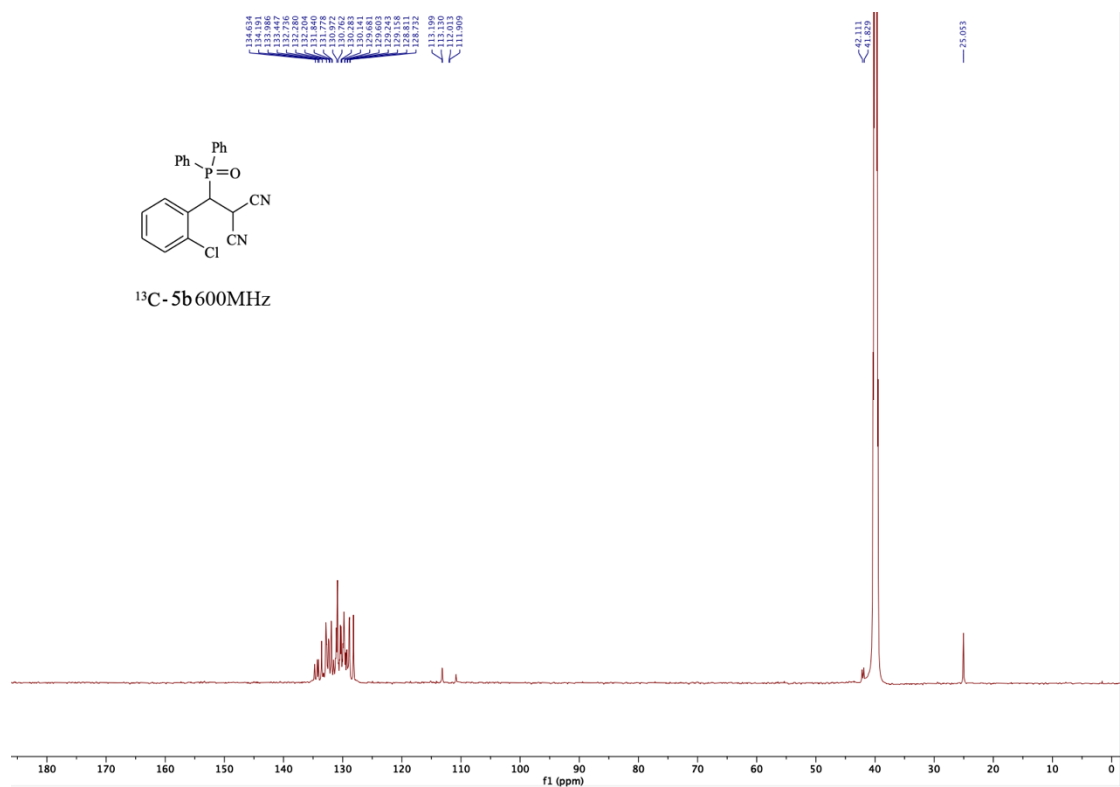

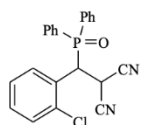

<sup>31</sup>P 5-b 600MHz

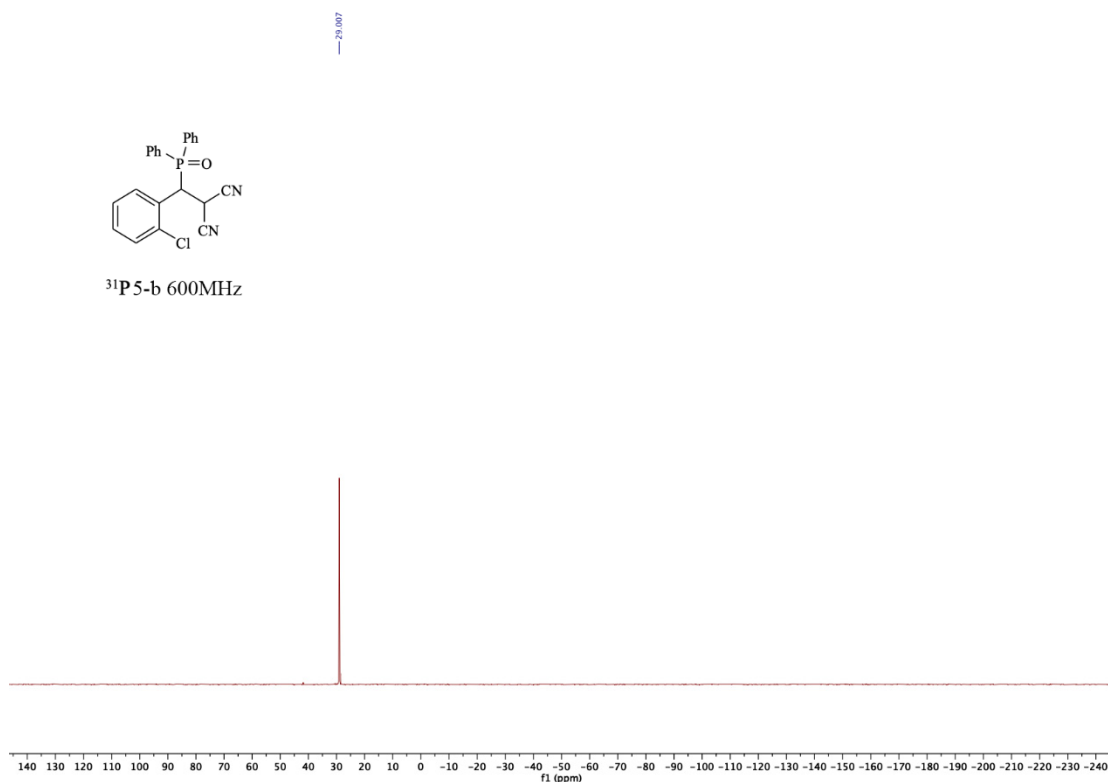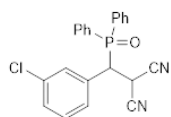

<sup>1</sup>H-5c 400MHz

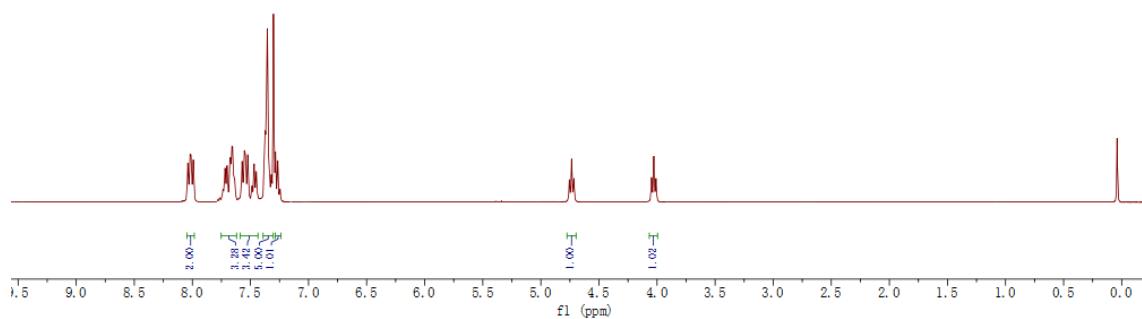

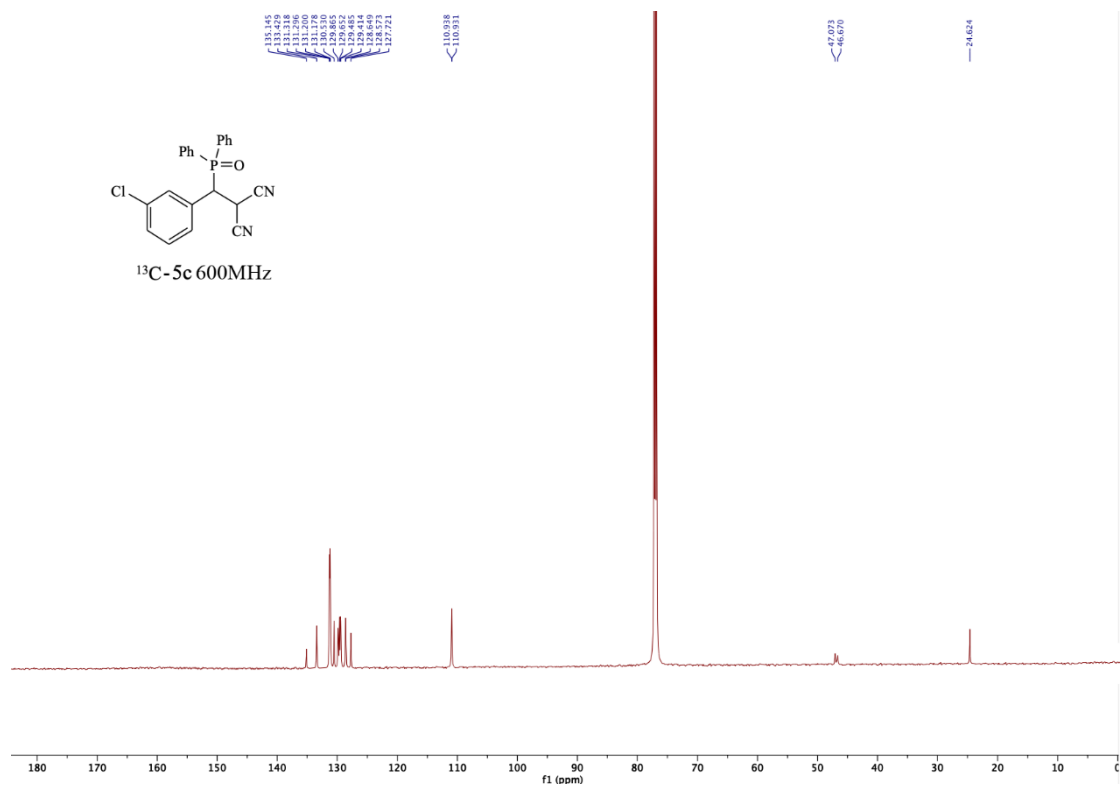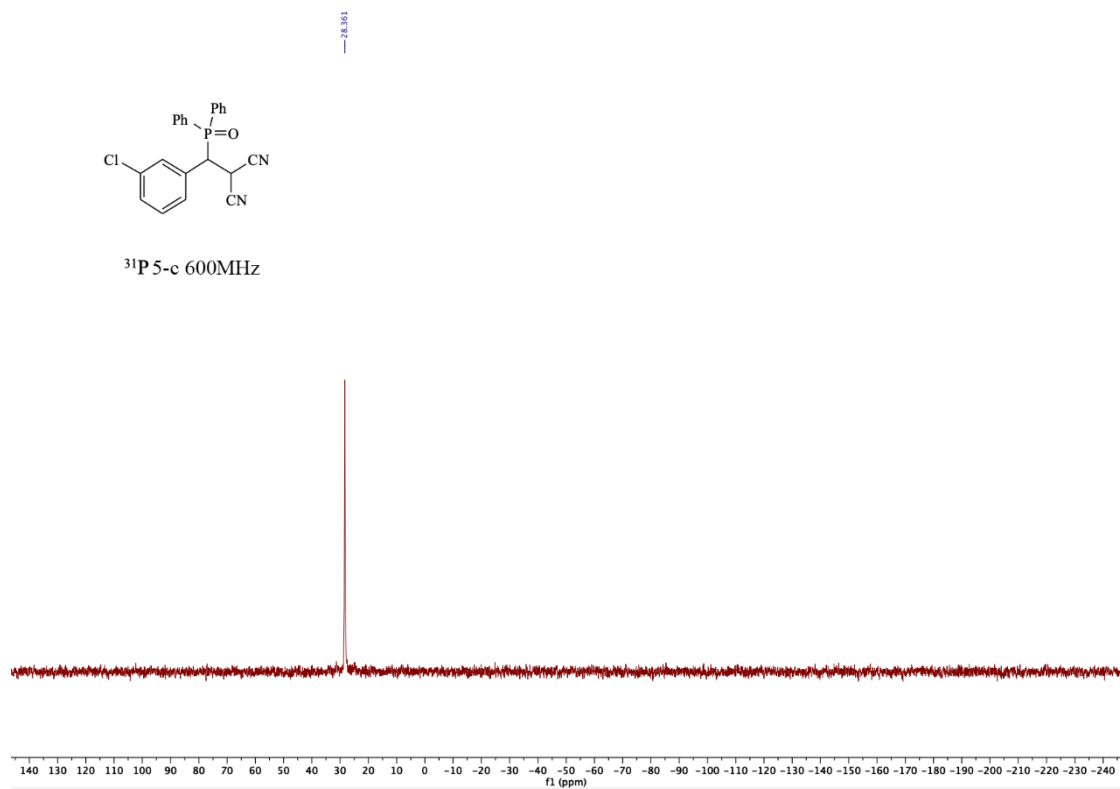

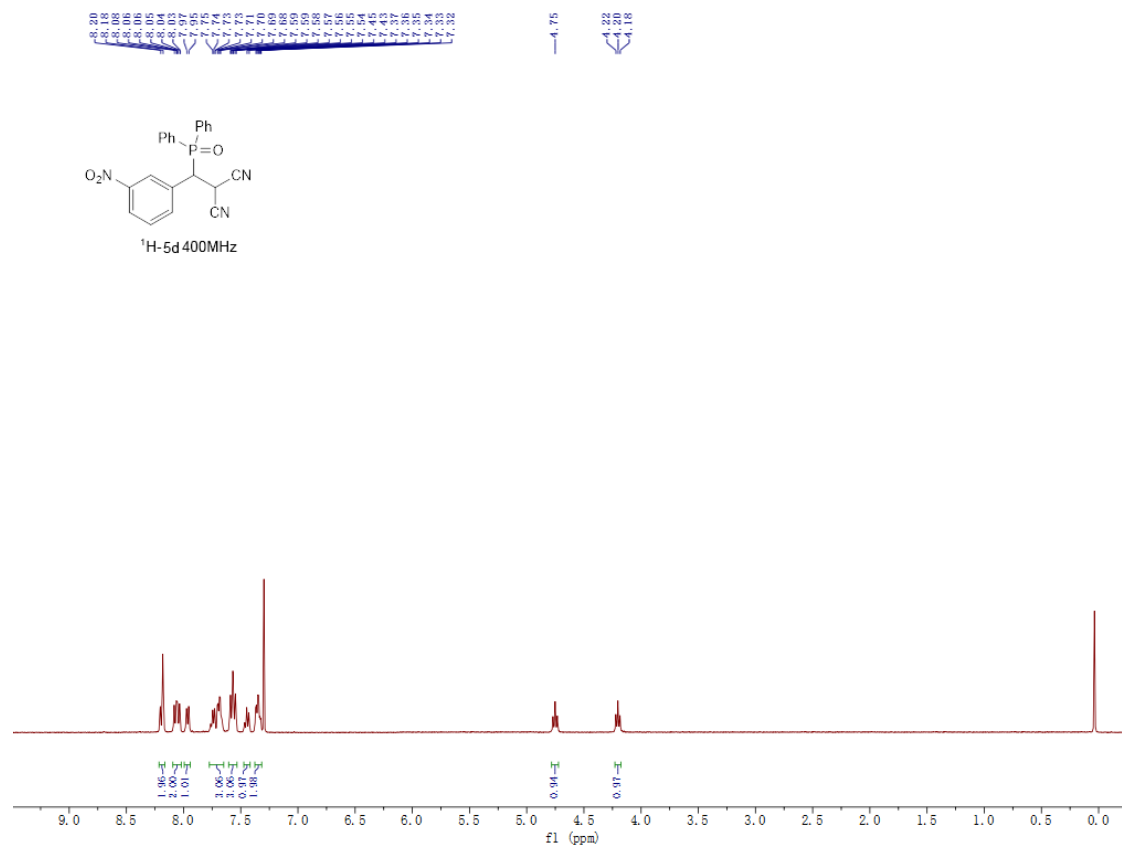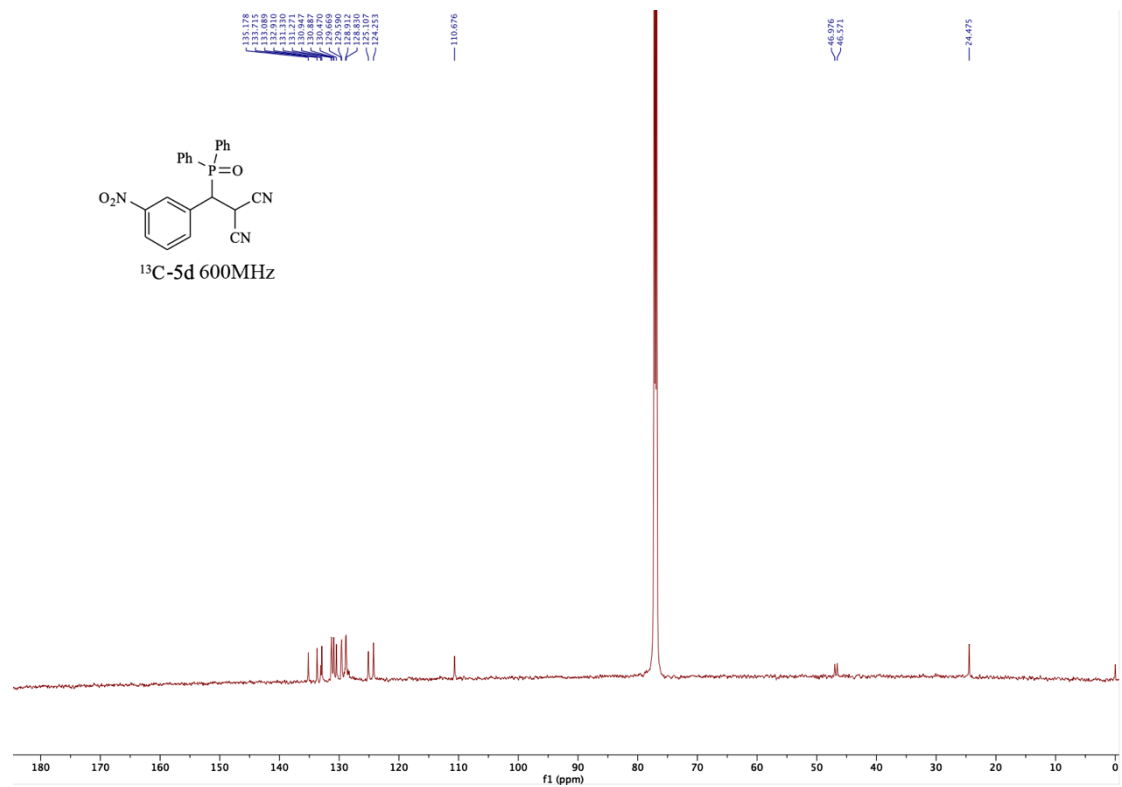

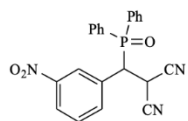

<sup>31</sup>P-5-d 600MHz

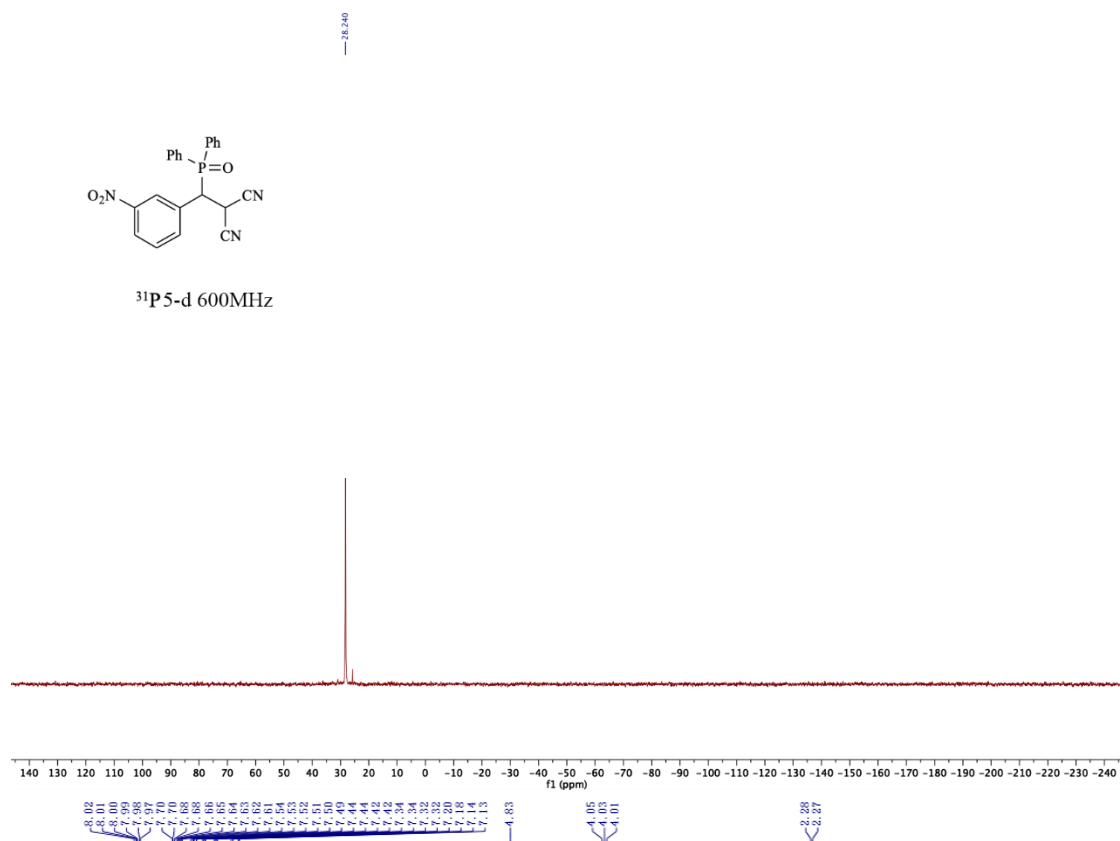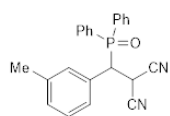

<sup>1</sup>H-5e 400MHz

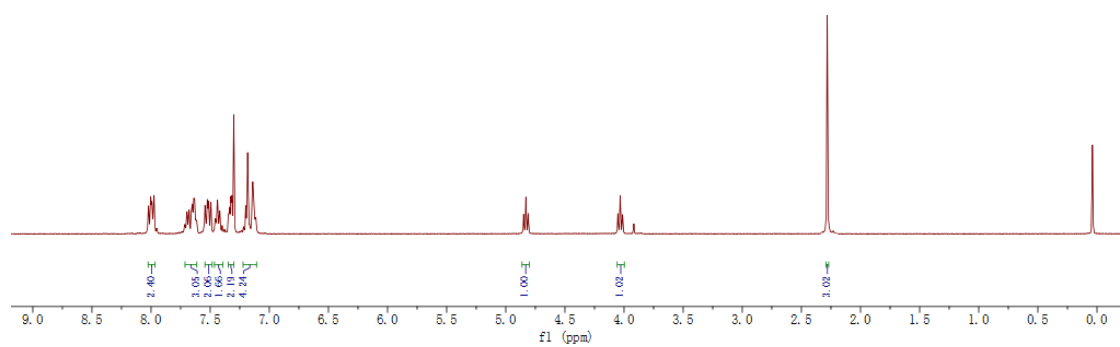

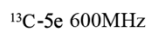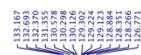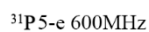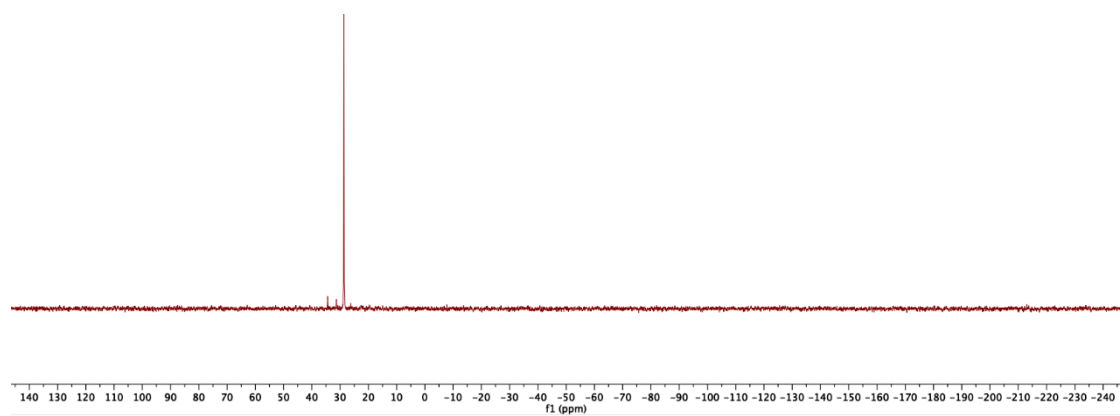



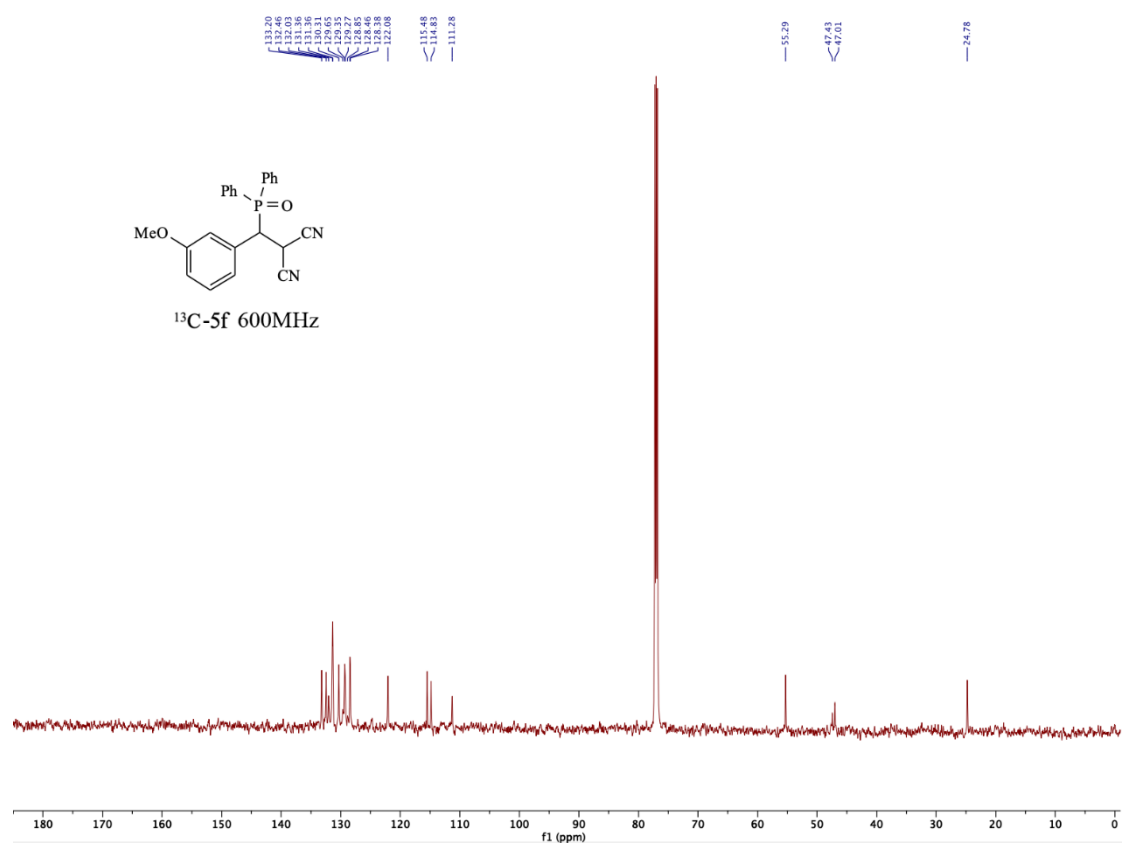

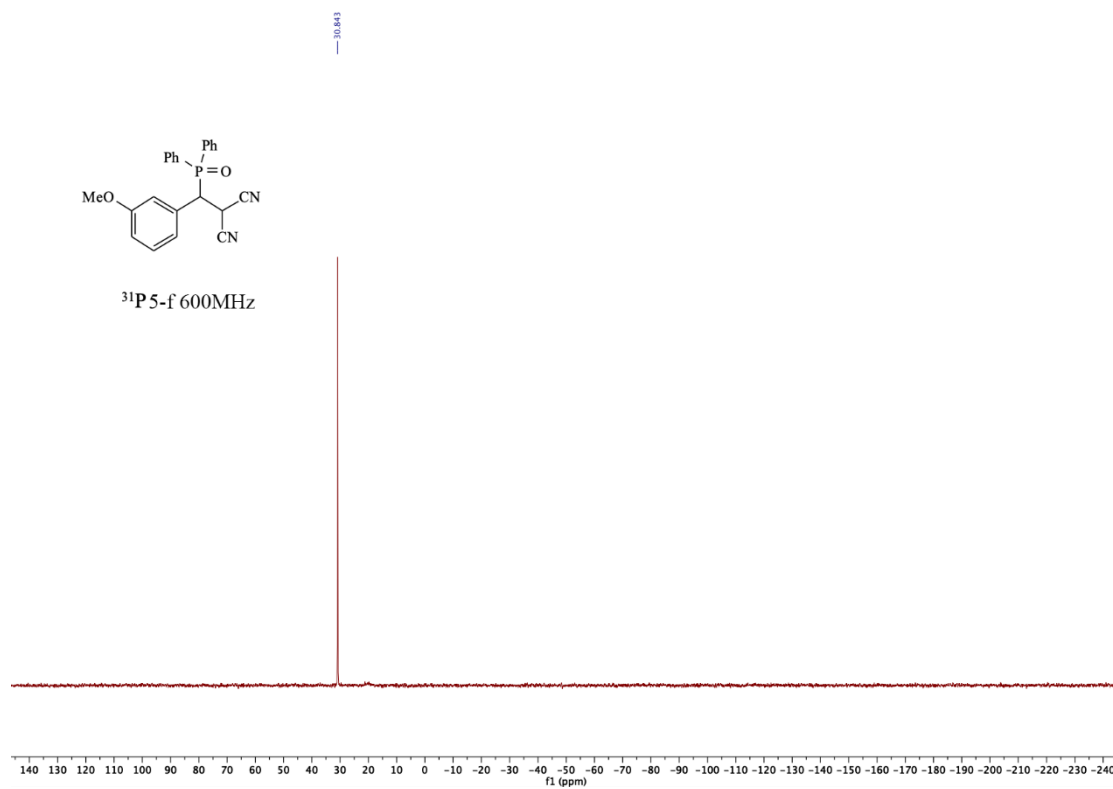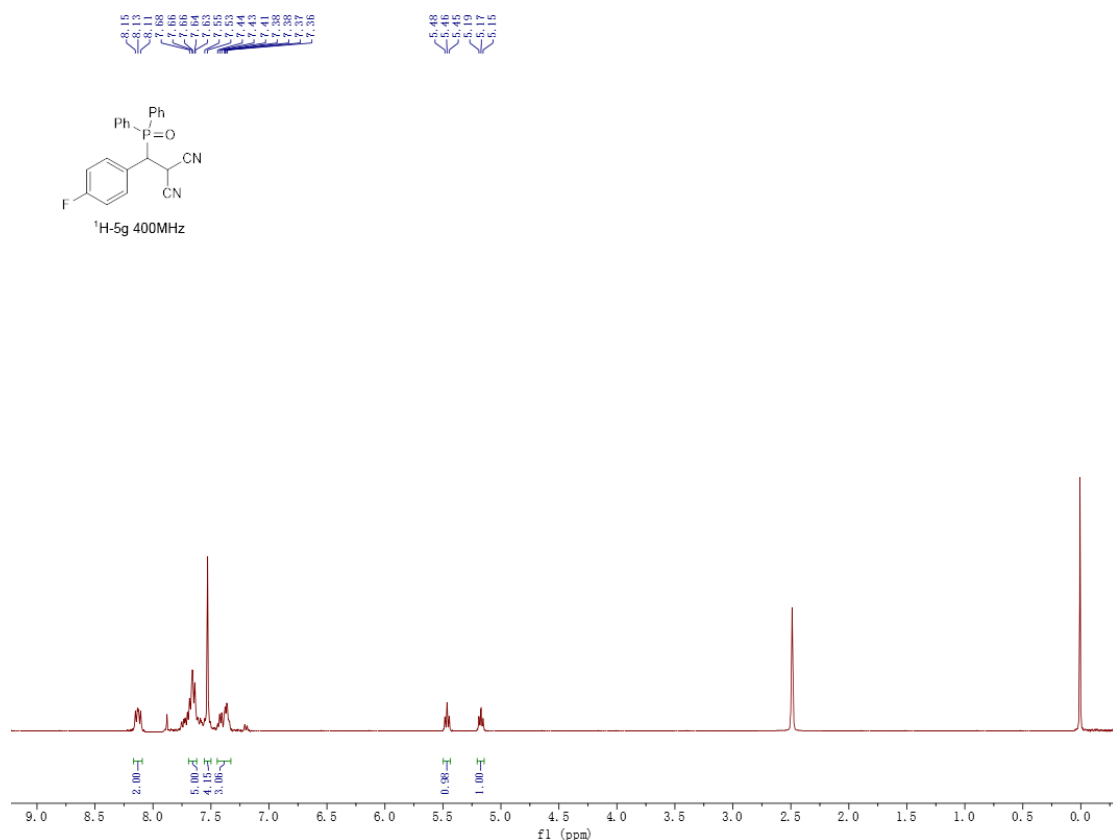

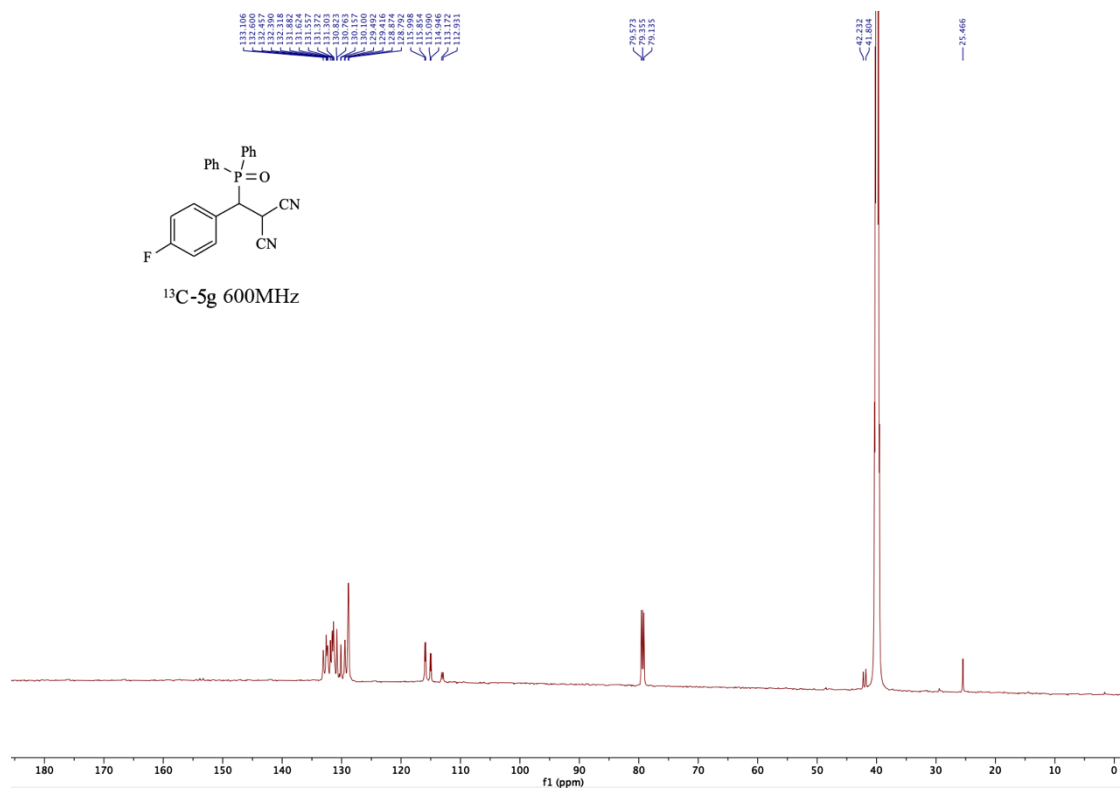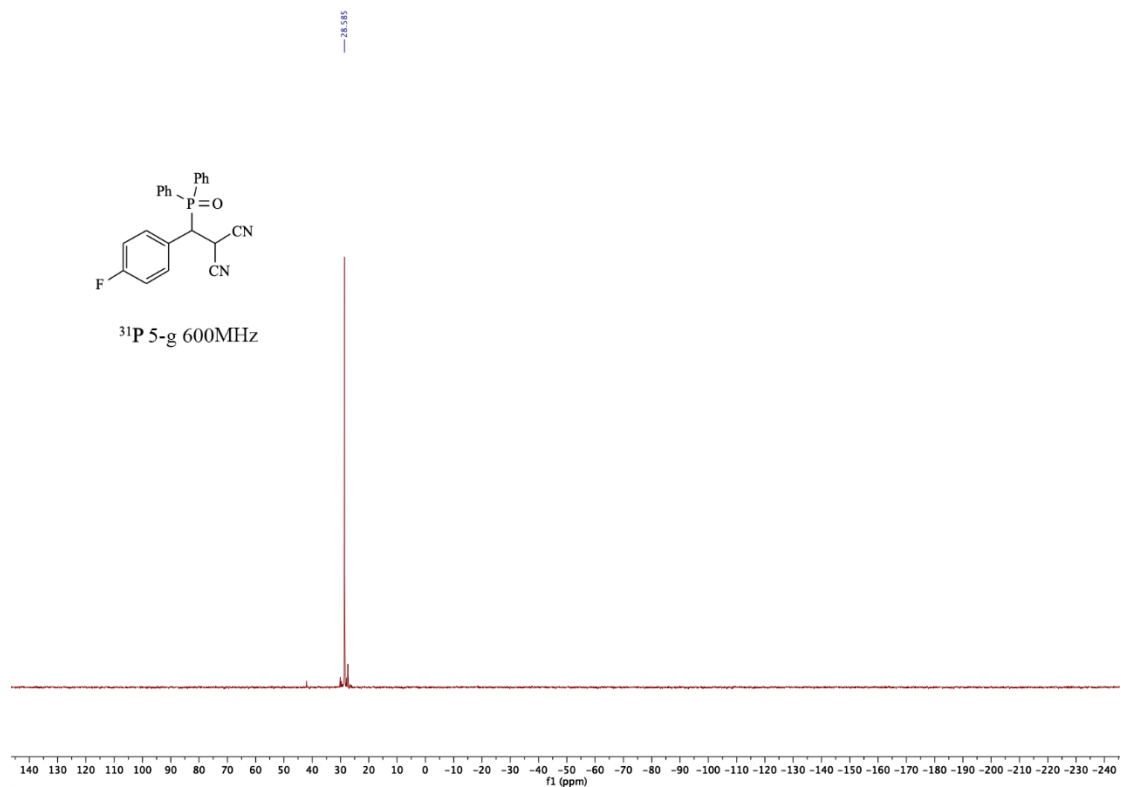

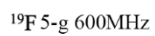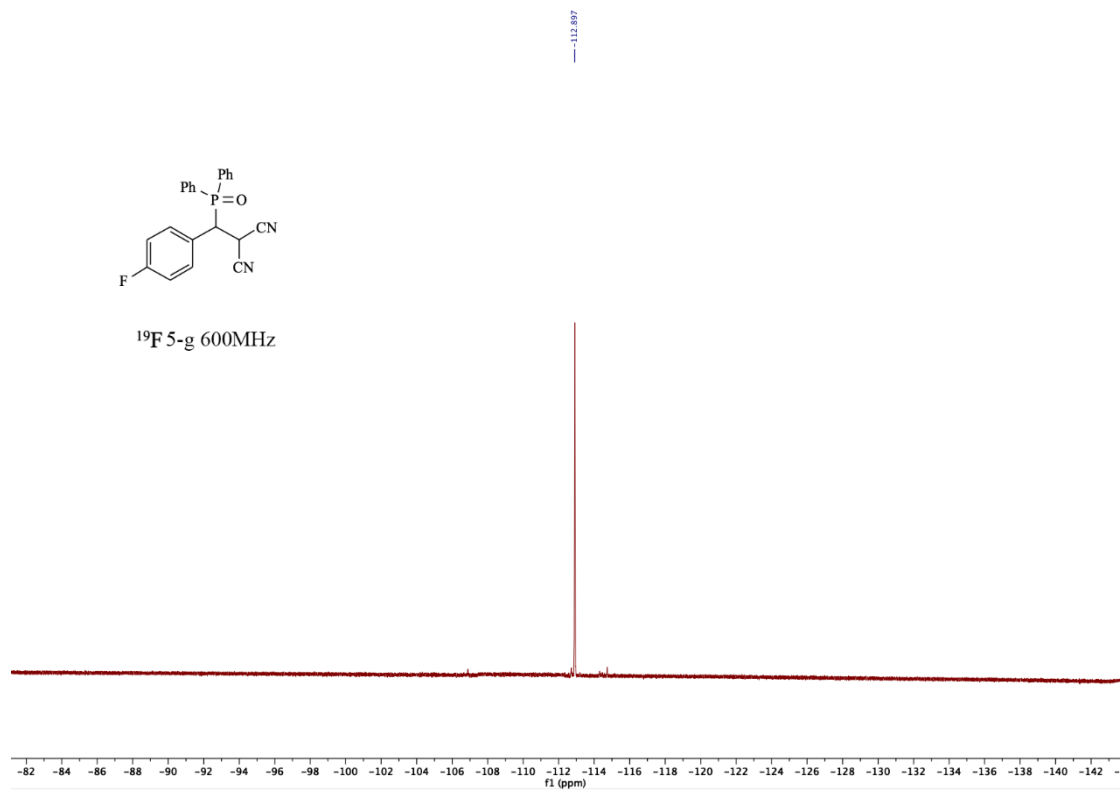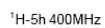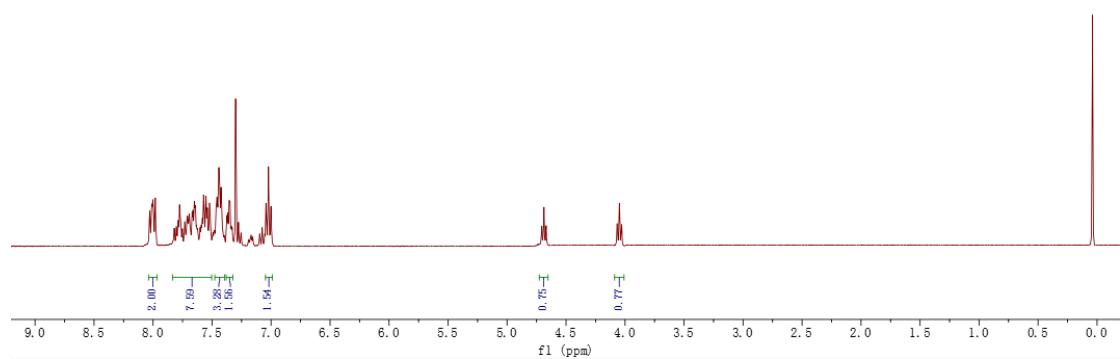

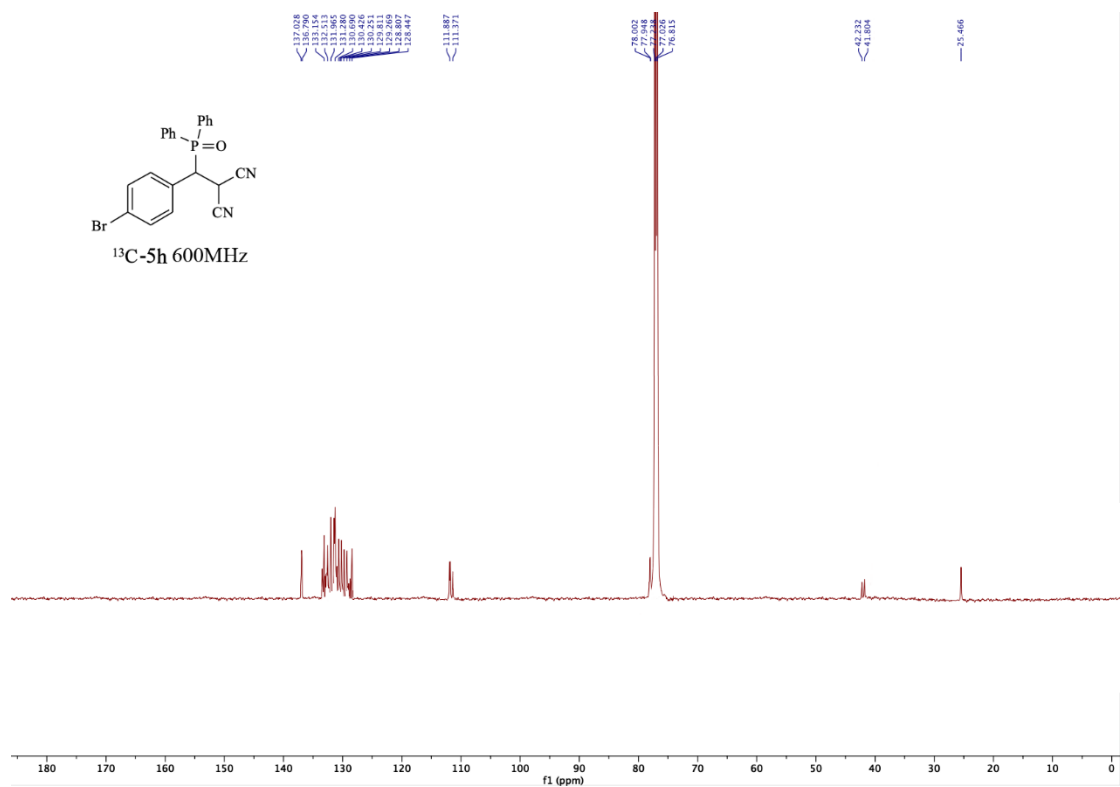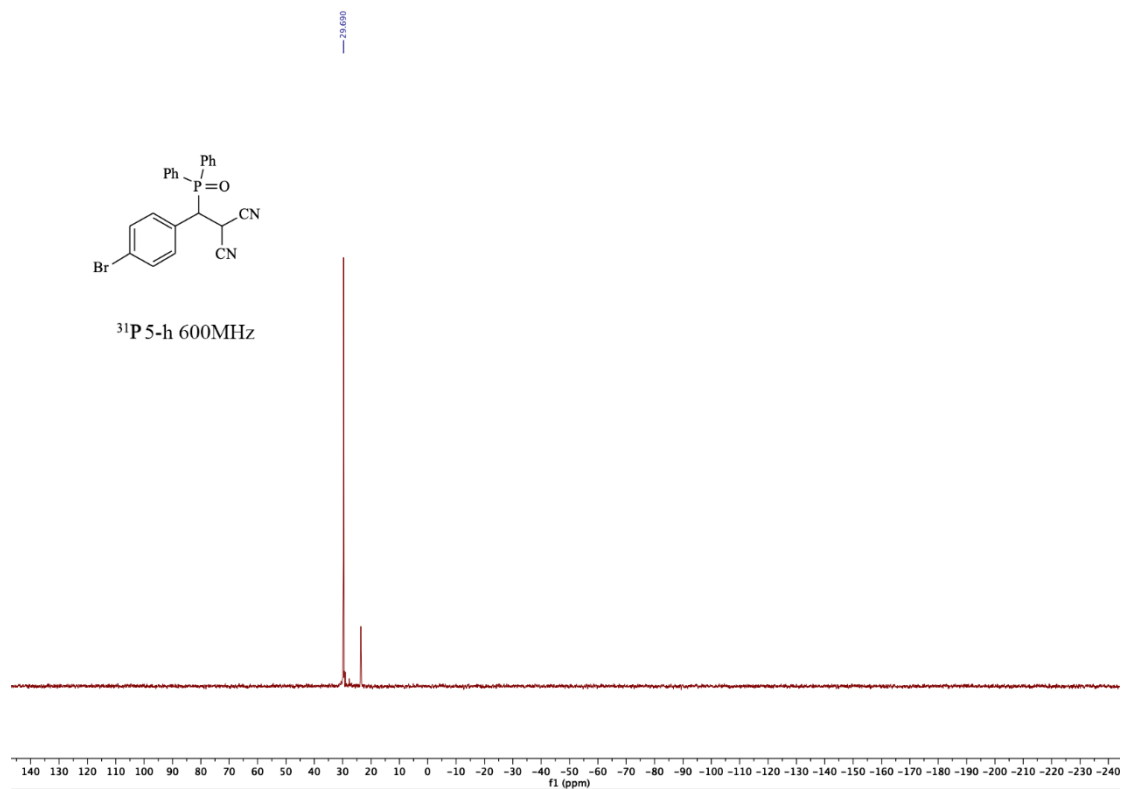

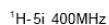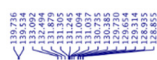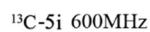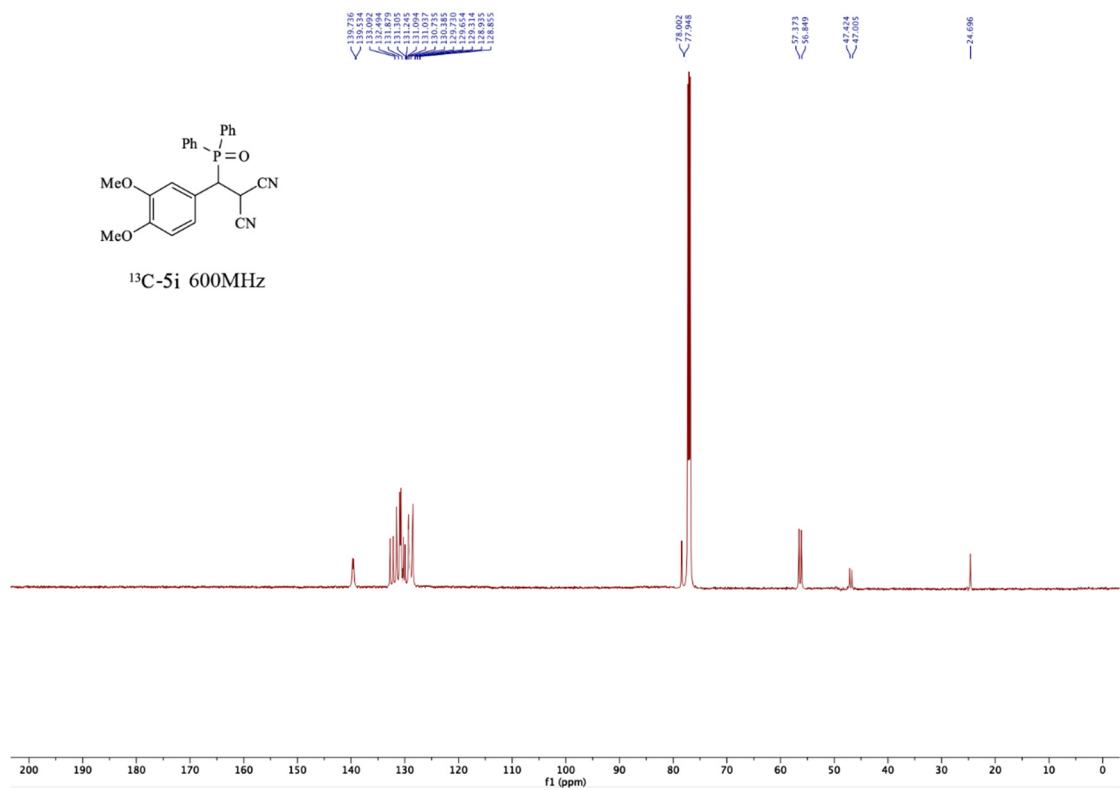

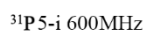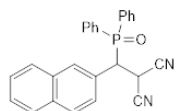<sup>1</sup>H-5j 400MHz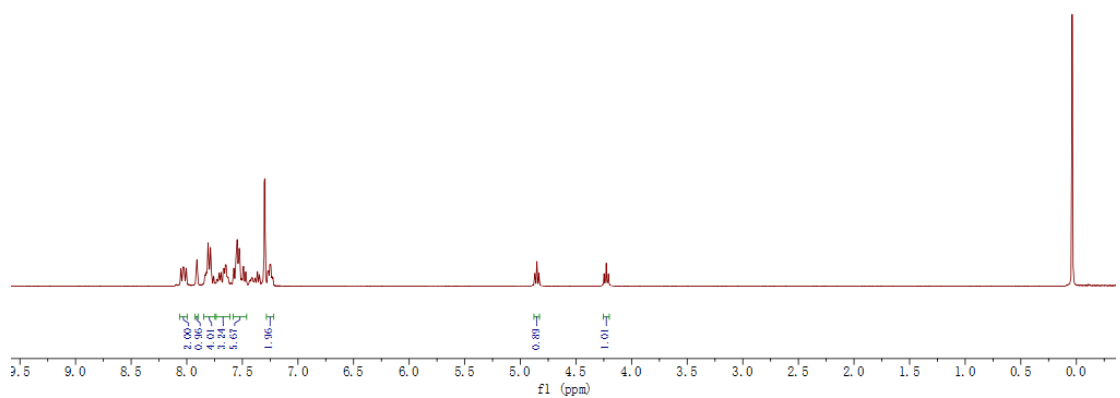

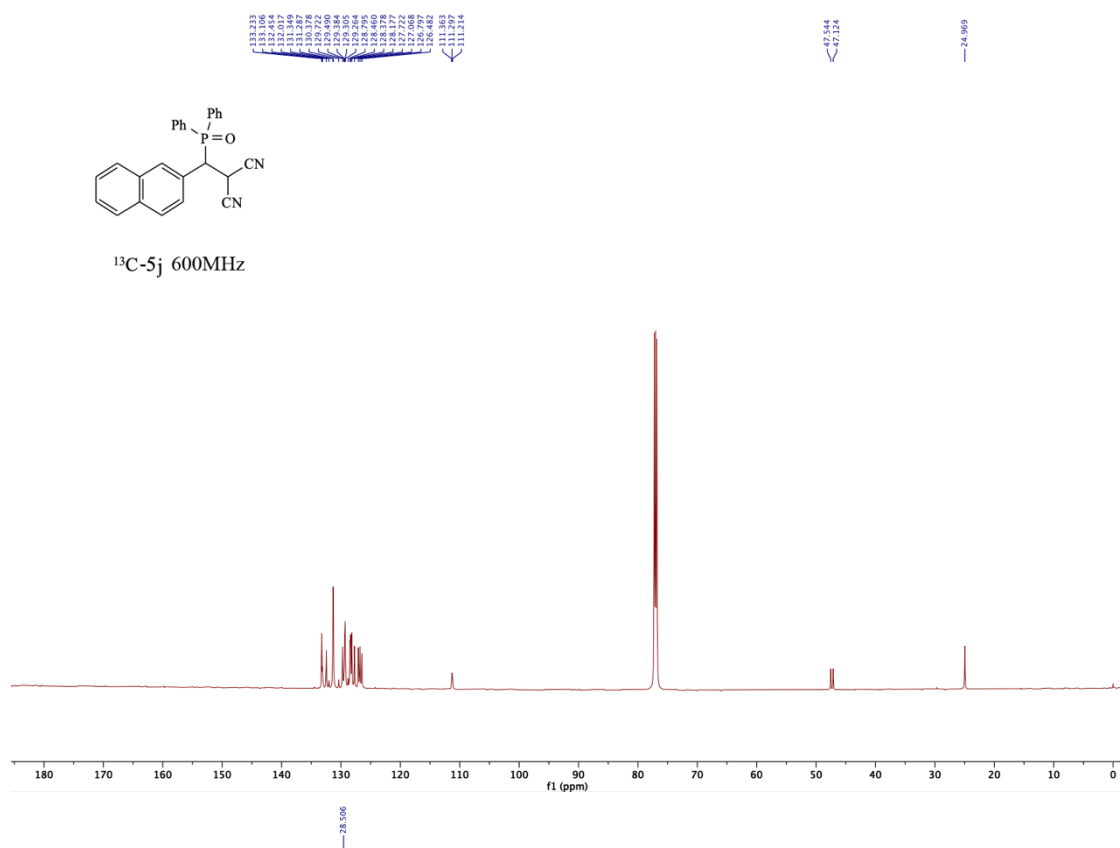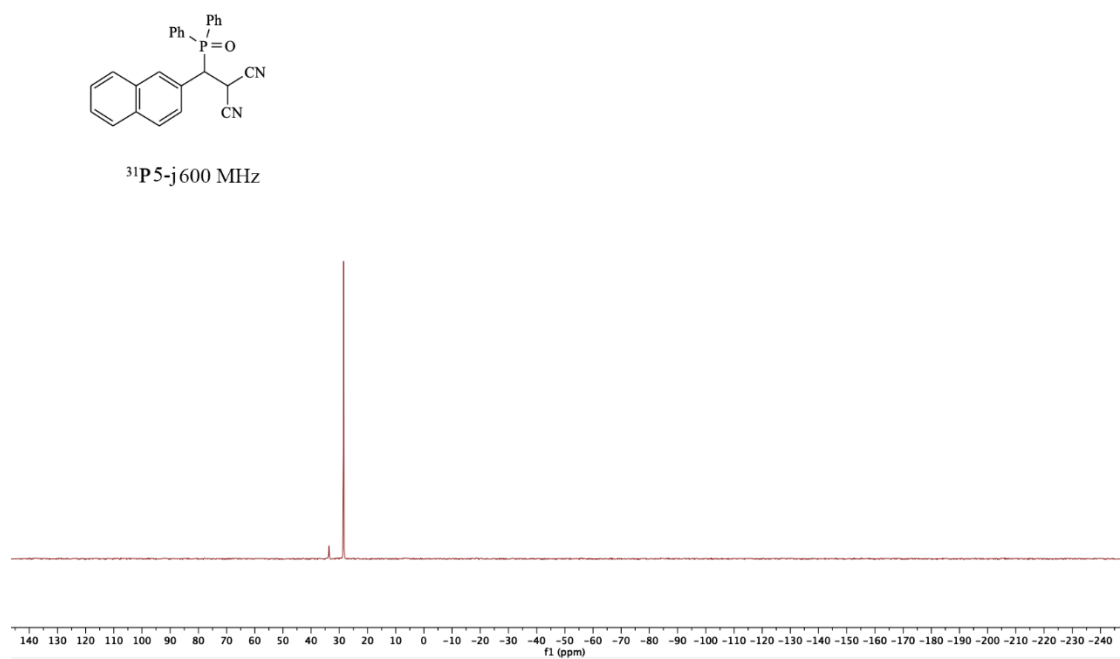



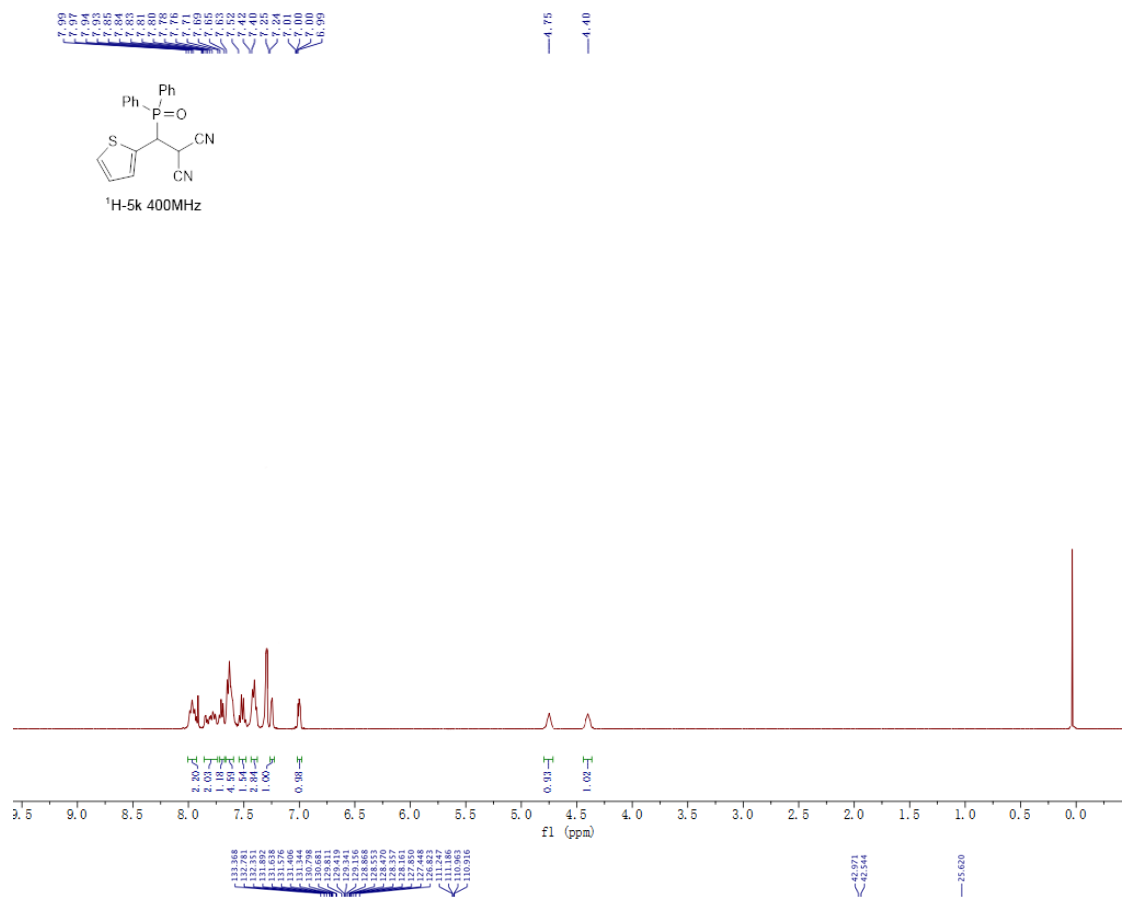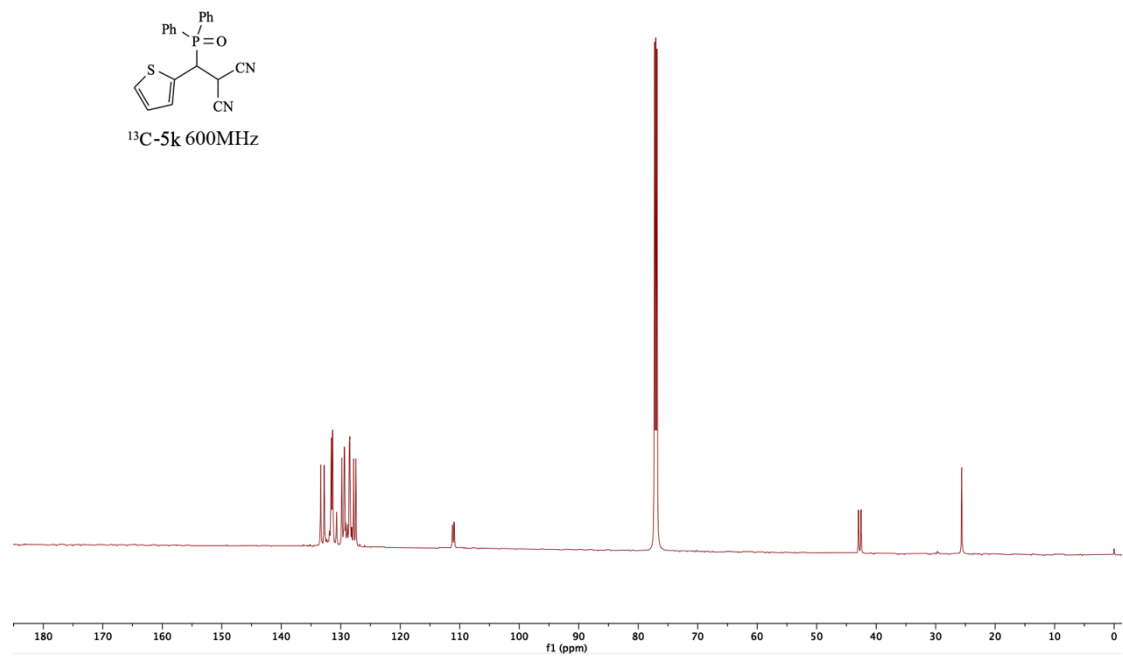

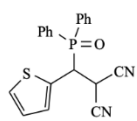

$^{31}\text{P}$  5-k 600 MHz

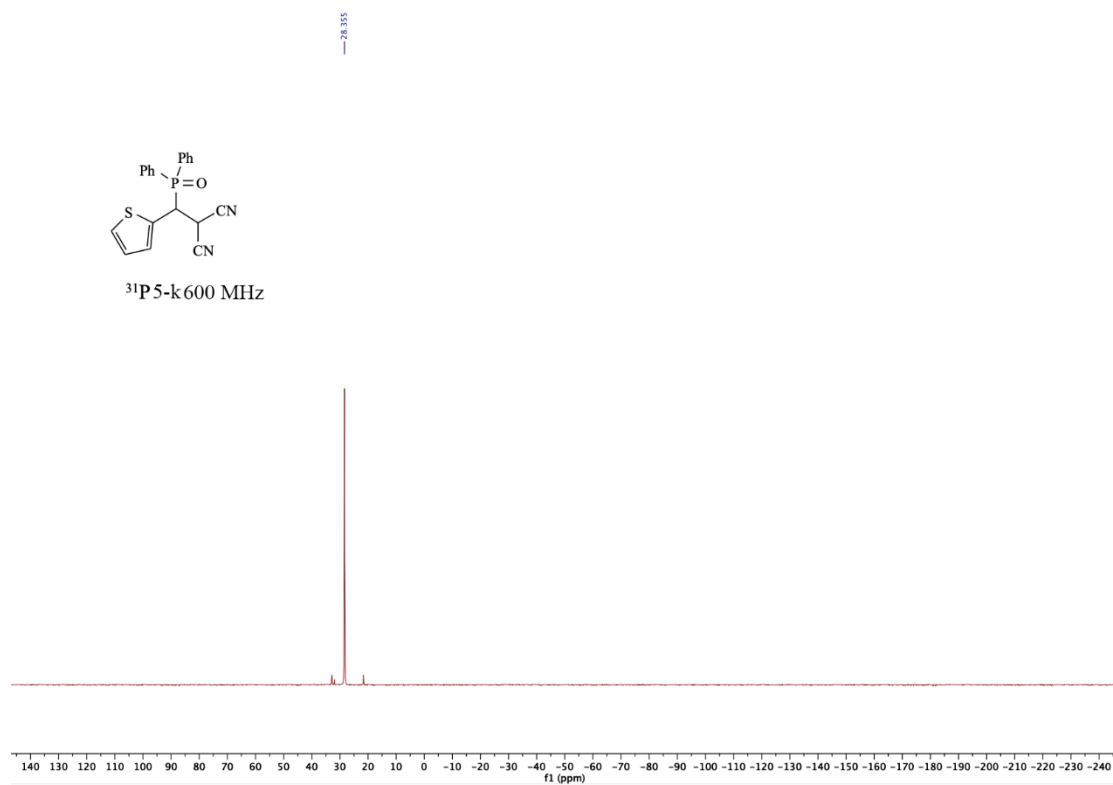

Supplement: s1 [file s1]
